# Supplementary material for: Room temperature catalytic dehydrogenation of cyclic amines with the liberation of H2using water as a solvent
Source: Royal Society of Chemistry journal article supplement (doi:10.1039/c9gc00201d), 2019-01-01
Supplement: c9gc00201d1.pdf [file c9gc00201d1.pdf]

## Supporting Information

### Room Temperature Catalytic Dehydrogenation of Cyclic Amines with Liberation of H<sub>2</sub> Using Water as a Solvent

Ekambaram Balaraman\*<sup>1</sup> and Manoj K. Sahoo<sup>2</sup>

<sup>1</sup>Department of Chemical Sciences, Indian Institute of Science Education and Research –  
Tirupati (IISER-T), Tirupati 517507, India.

<sup>2</sup>Organic Chemistry Division, Dr. Homi Bhabha Road, CSIR-National Chemical Laboratory  
(CSIR-NCL), Pune-411008, India.

### Table of Contents

|    |                                                    |         |
|----|----------------------------------------------------|---------|
| 1. | Mechanistic studies                                | S2-S5   |
| 2. | Copy of <sup>1</sup> H and <sup>13</sup> C Spectra | S6-S25  |
| 3. | Copy of HRMS data                                  | S26-S35 |

# 1. Mechanistic Studies

## 1.1 UV-Visible spectra of proton reduction catalysts

Solutions of  $10^{-4}$  M was prepared for all Co-based proton reduction catalysts used for the present catalytic study as well as for  $[\text{Ru}(\text{bpy})_3]^{2+}$  using analytical grade acetonitrile. Then the solution-state UV-Visible spectra were recorded and are given in Figure S1. From the UV-visible absorption spectra of proton reduction catalysts, it is found that the proton reduction catalysts do not absorb in the visible-light region. However, the photoredox catalyst  $[\text{Ru}(\text{bpy})_3]^{2+}$  absorbs the visible-light, hence initiates the redox reaction *via* single electron transfer process and not the proton reduction catalysts.

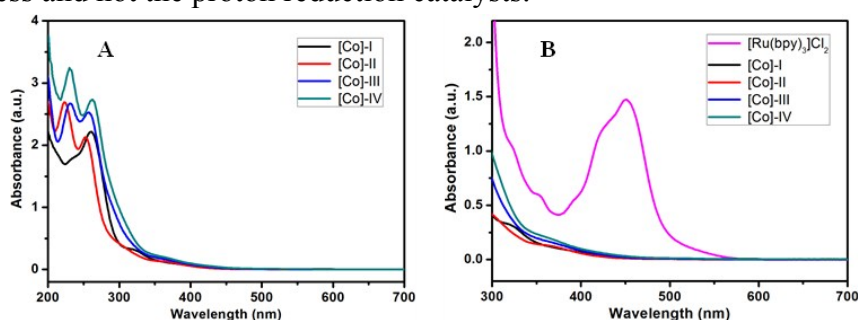

**Figure S1.** (A) UV-Visible spectra of proton reduction catalysts used for the present study. (B) Comparison of UV-Visible spectral absorbance of  $[\text{Ru}(\text{bpy})_3]\text{Cl}_2$  with proton reduction catalysts used for the present study.

## 1.2 Detection of liberated gas

The liberated hydrogen gas was detected and quantified after completion of the reaction for substrate **1a**.

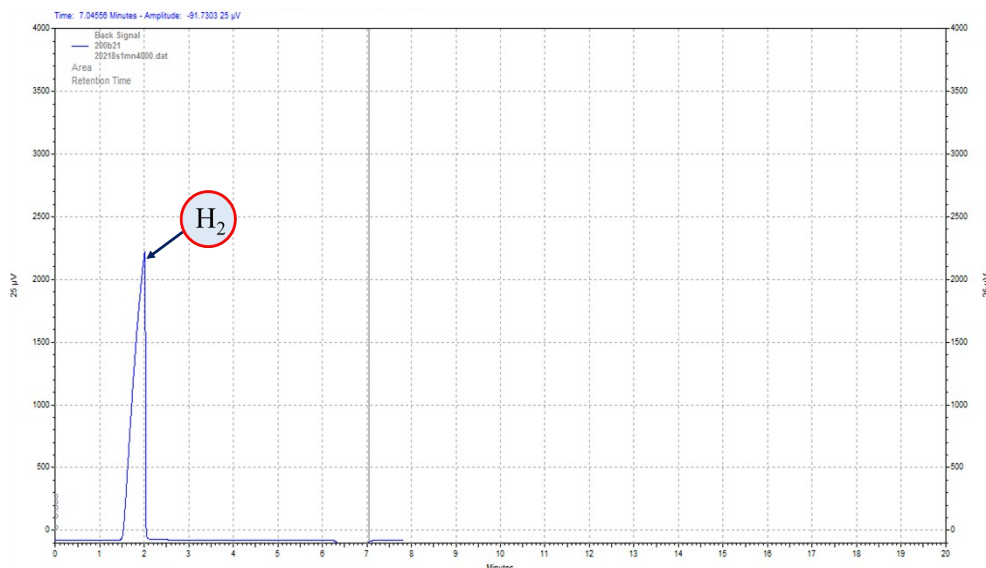

**Figure S2.** GC analysis.

### 1.3 Quantification of hydrogen gas

The evolved hydrogen gas was quantified by the hydrogenation of styrene, and it is observed that 76% of hydrogen gas was evolved from the hydrogenation reaction while the isolated yield of **2a** is 93%. The evolved hydrogen gas was utilized for hydrogenation of styrene. Simultaneously two parallel reactions were carried out. In one reaction vial, visible-light mediated photoredox catalytic acceptorless dehydrogenation of **1a** was carried out under the optimal reaction condition. Whereas in another reaction vial thermal hydrogenation of styrene **5** was carried out using  $\text{RhCl}(\text{PPh}_3)_3$  as the catalyst. Both the reaction vials are connected to each other by a cannula and were allowed to continue for 12 h. After the stipulated time, the reaction mixture was analyzed in GC for hydrogenation of styrene and the results are given below.

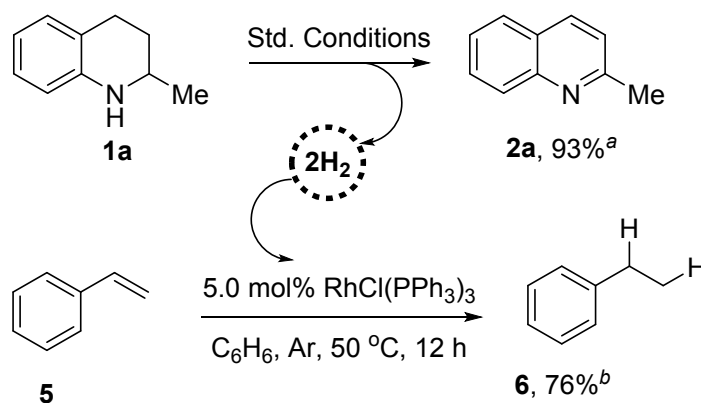

Figure S3. Quantification of hydrogen.

Reaction conditions: Substrate (0.25 mmol),  $[\text{Ru}(\text{bpy})_3]\text{Cl}_2$  (1.0 mol %),  $[\text{Co}]$  (2.5 mol %), water 8.0 mL, ambient temperature, 12 h, 36 W blue LED, <sup>a</sup>Isolated yield, <sup>b</sup>GC yield using n-decane as internal standard.

### 1.4 Cyclic voltammetric analysis

#### 1.4a Cyclic voltammetry of proton reduction catalyst IV

Redox potentials of proton reduction catalyst and photocatalyst were judged through cyclic voltammetric (CV) investigations. Typically three electrode systems comprising glassy carbon (GC, 3mm dia.) was used as working electrode and  $\text{Ag}/\text{Ag}^+$  (0.1M TBAP in acetonitrile) as reference electrode and platinum wire was used as counter electrode, respectively. CVs were recorded in acetonitrile containing 0.1M TBAP as electrolytic medium. Solutions were purged with argon for 30 minutes before scans and also jacketed during the measurements. Potentials were calibrated using the ferrocene as internal standard.

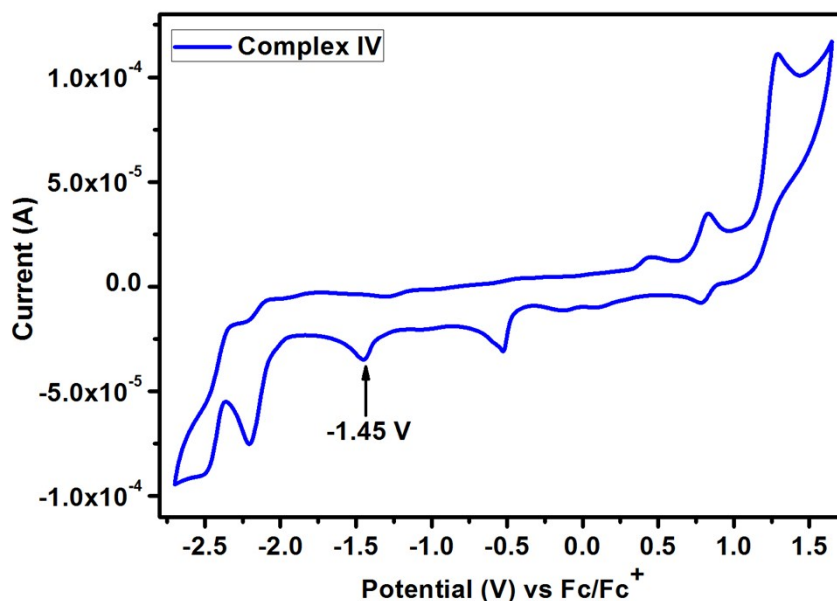

**Figure S4.** CV of IV (0.001 M) in 0.1 M NBu<sub>4</sub>PF<sub>6</sub> in degassed CH<sub>3</sub>CN with scan rate 100 mV/s.

#### 1.4b Cyclic voltammetry of partially saturated *N*-heterocycles

In order to get insight into the oxidation potential of the partially saturated *N*-heterocycles, we recorded the cyclic voltammetry data for few of the compounds. The cyclic voltammetry was measured at 10 mV s<sup>-1</sup> scan rate using Ag/AgCl as reference electrode, Pt wire as counter electrode and glassy carbon electrode as working electrode in anhydrous degassed acetonitrile with 0.1 M tetrabutylammonium perchlorate (TBAP) as supporting electrolyte. The oxidation potential for **1a**, **3f** and **3h** are given below.

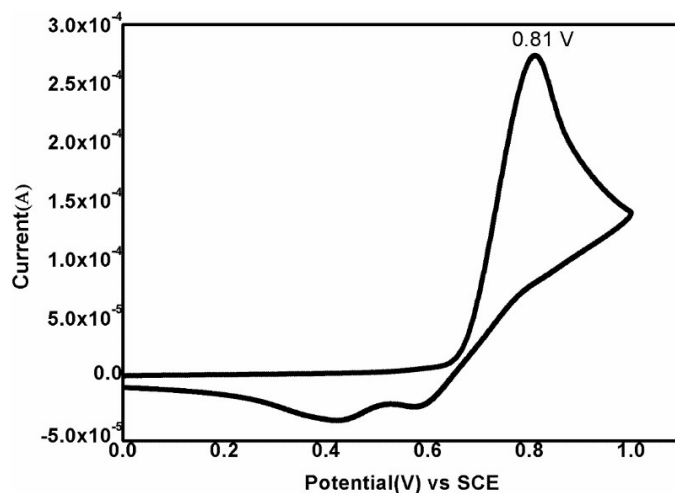

**Figure S5.** CV of **1a** (0.01 M) in 0.1 M NBu<sub>4</sub>PF<sub>6</sub> in degassed MeCN with scan rate 10 mV/s.

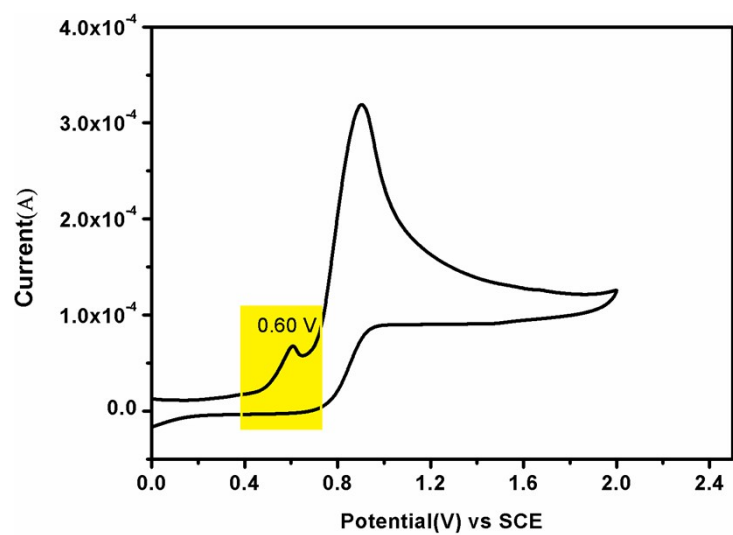

**Figure S6.** CV of **3f** (0.01 M) in 0.1 M  $\text{NBu}_4\text{PF}_6$  in degassed MeCN with scan rate 10 mV/s.

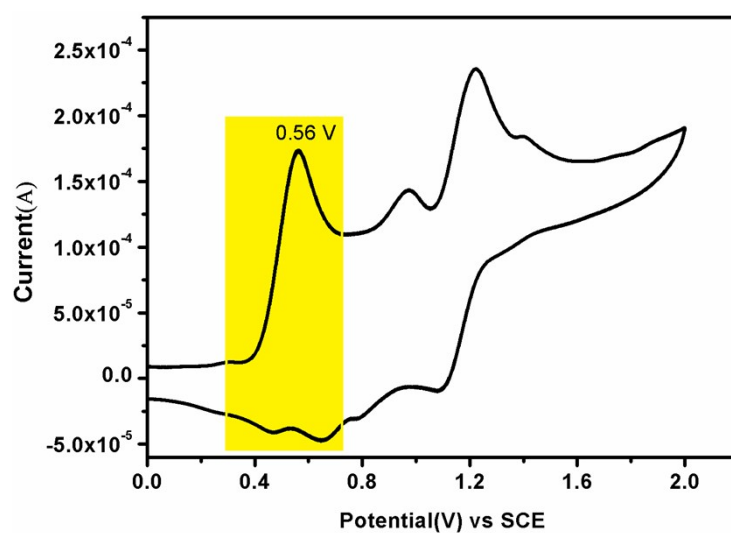

**Figure S7.** CV of **3h** (0.01 M) in 0.1 M  $\text{NBu}_4\text{PF}_6$  in degassed MeCN with scan rate 10 mV/s.

## 2. Copy of $^1\text{H}$ and $^{13}\text{C}$ NMR Spectra

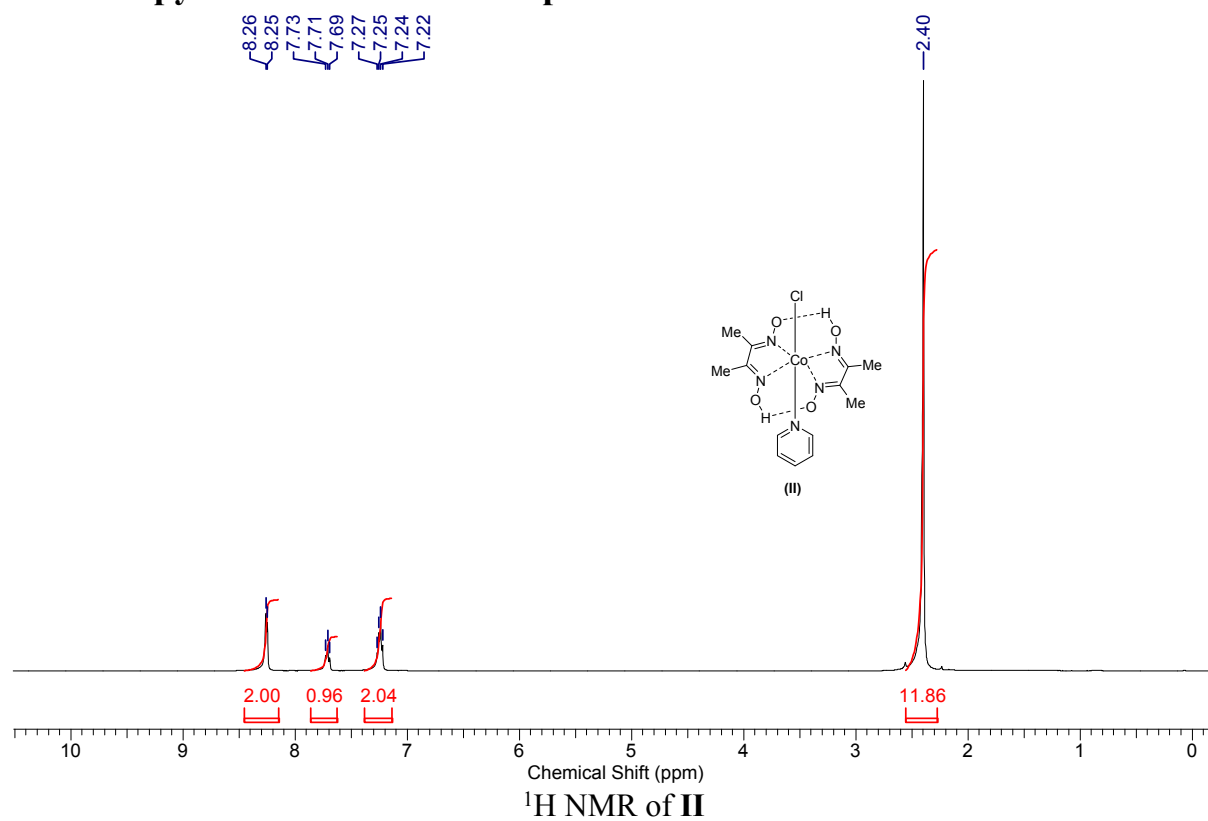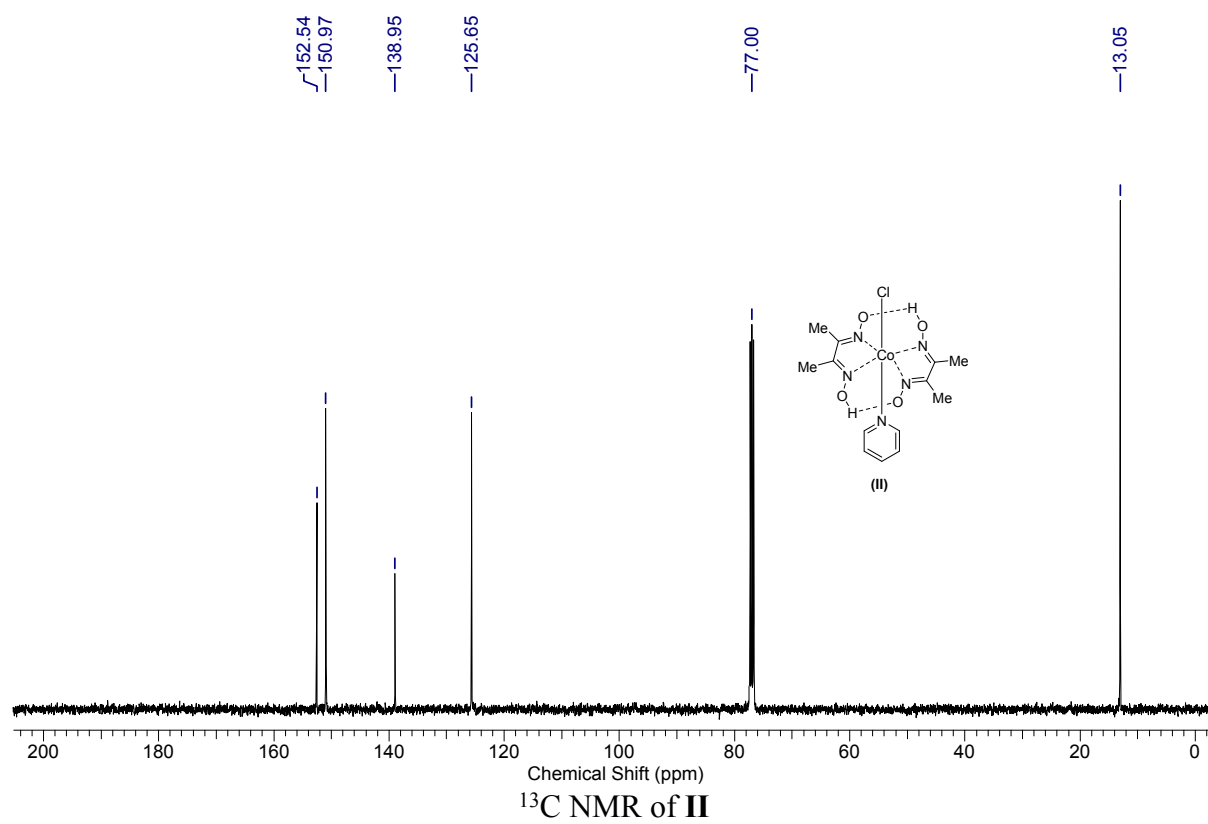

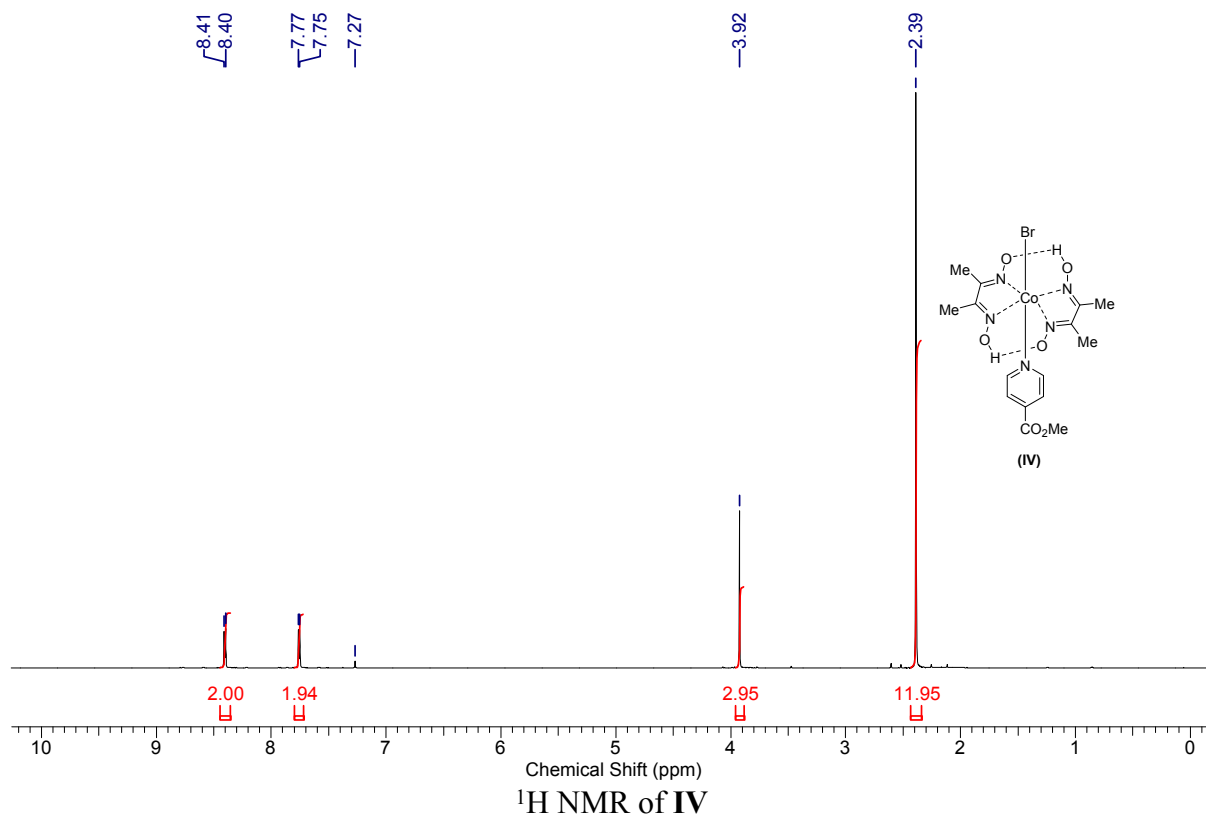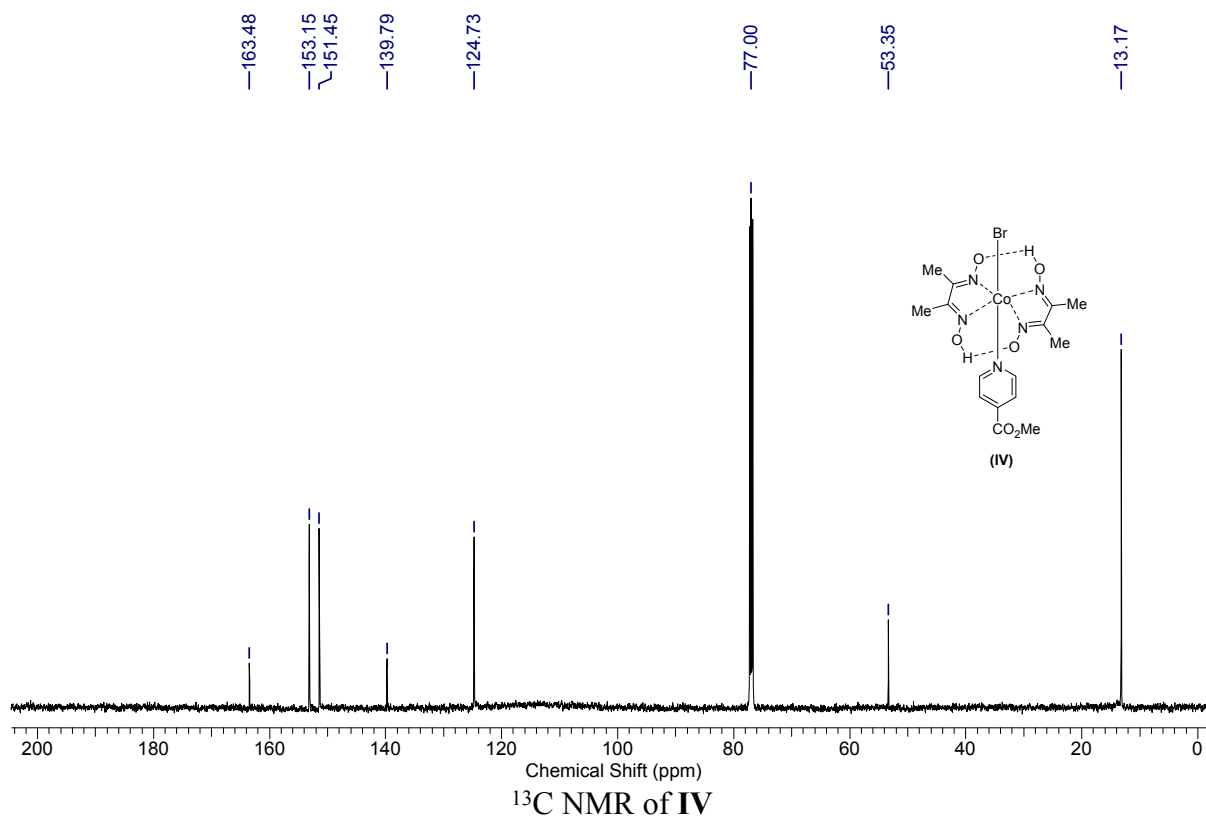

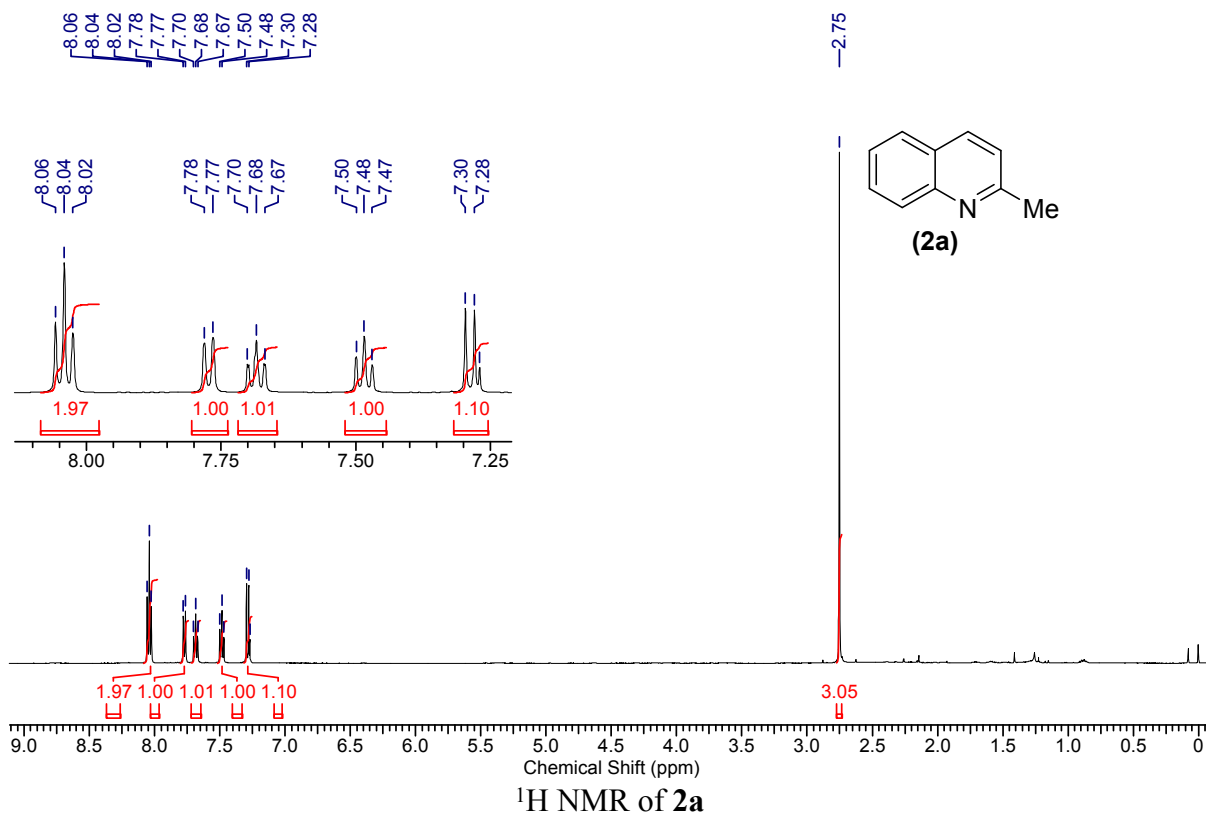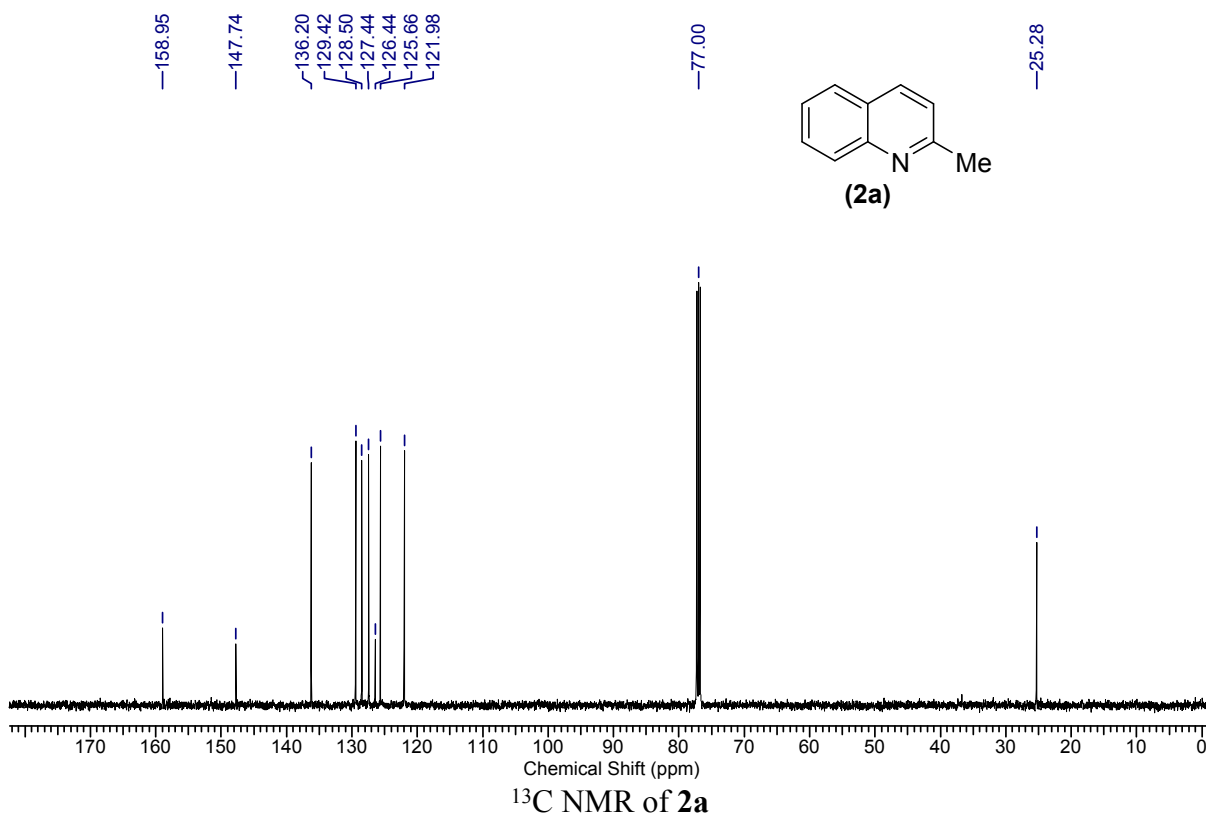



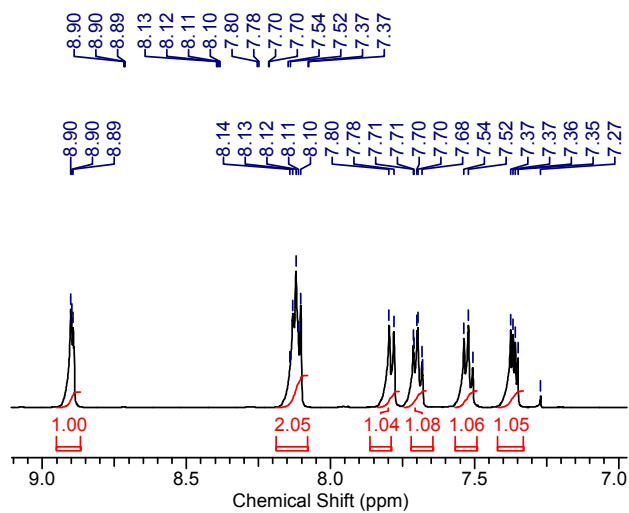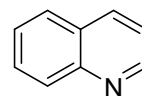

(2b)

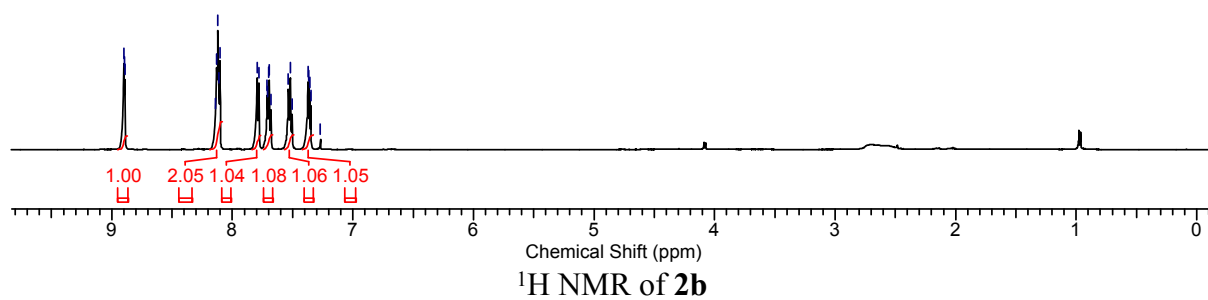

<sup>1</sup>H NMR of **2b**

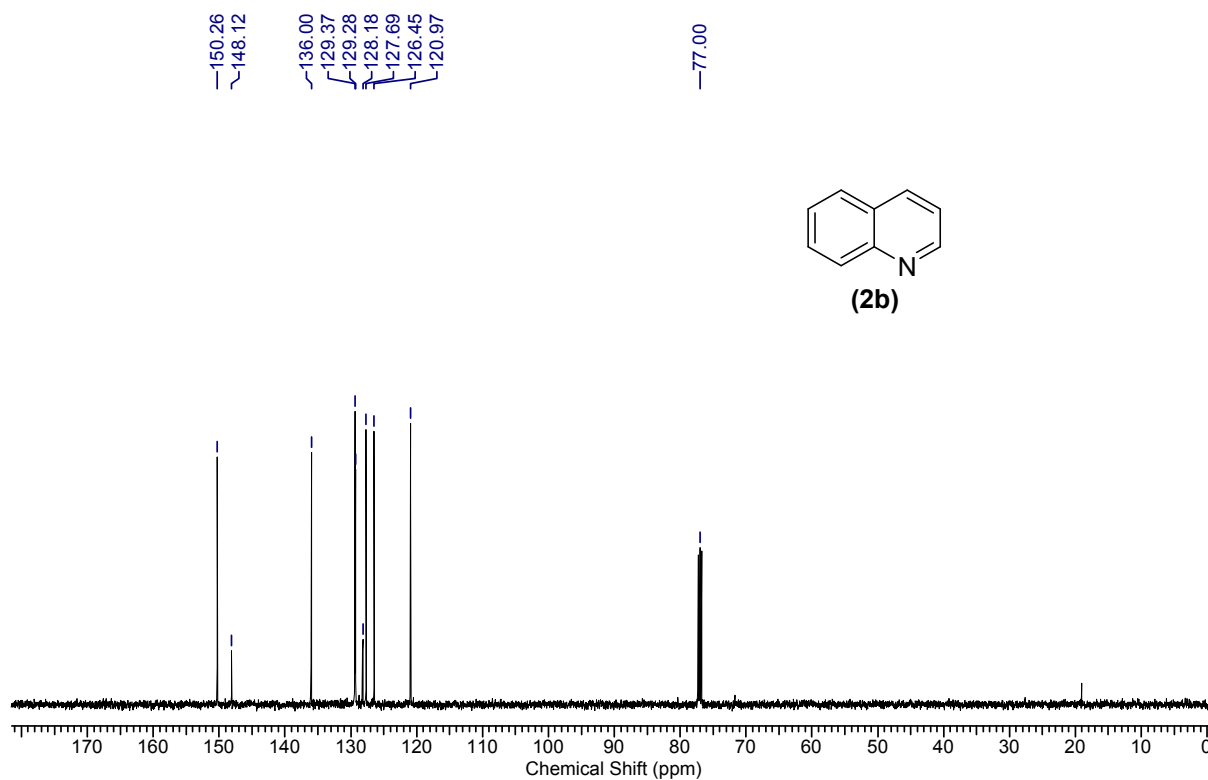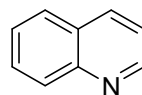

(2b)

<sup>13</sup>C NMR of **2b**

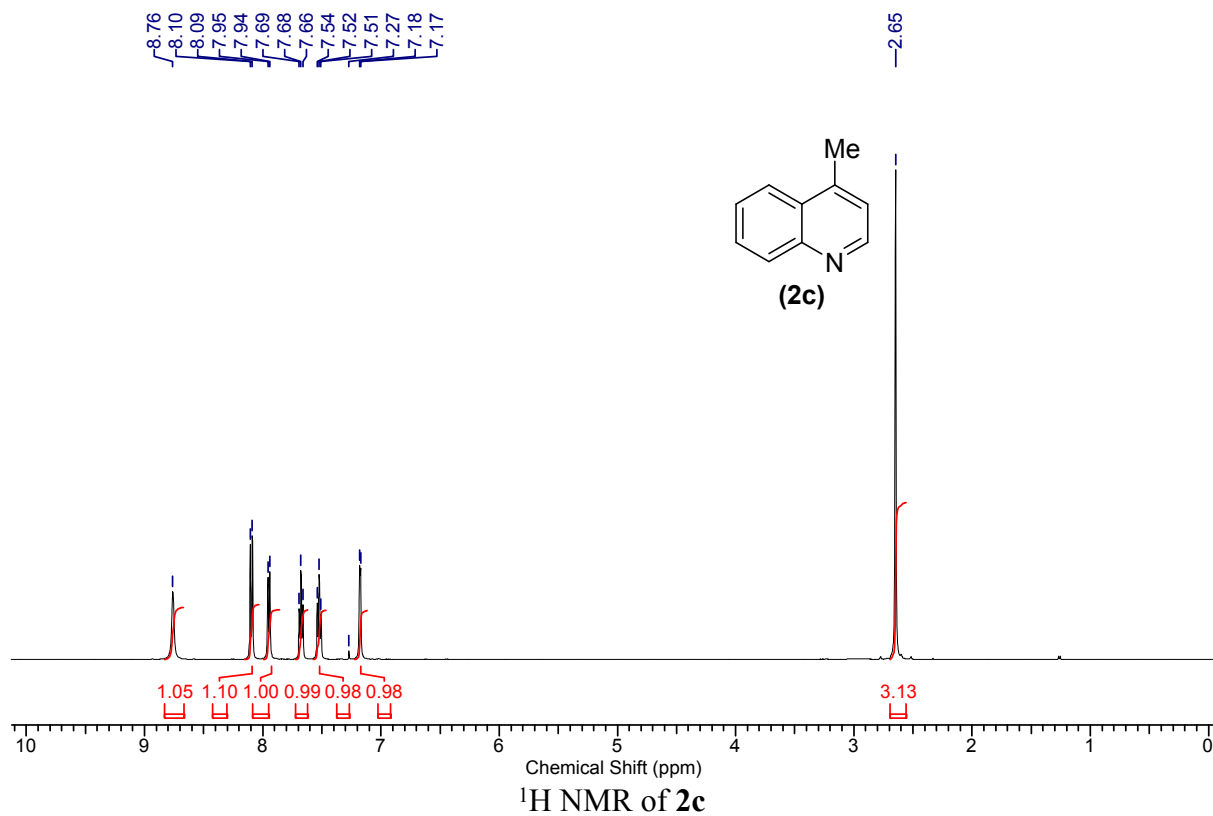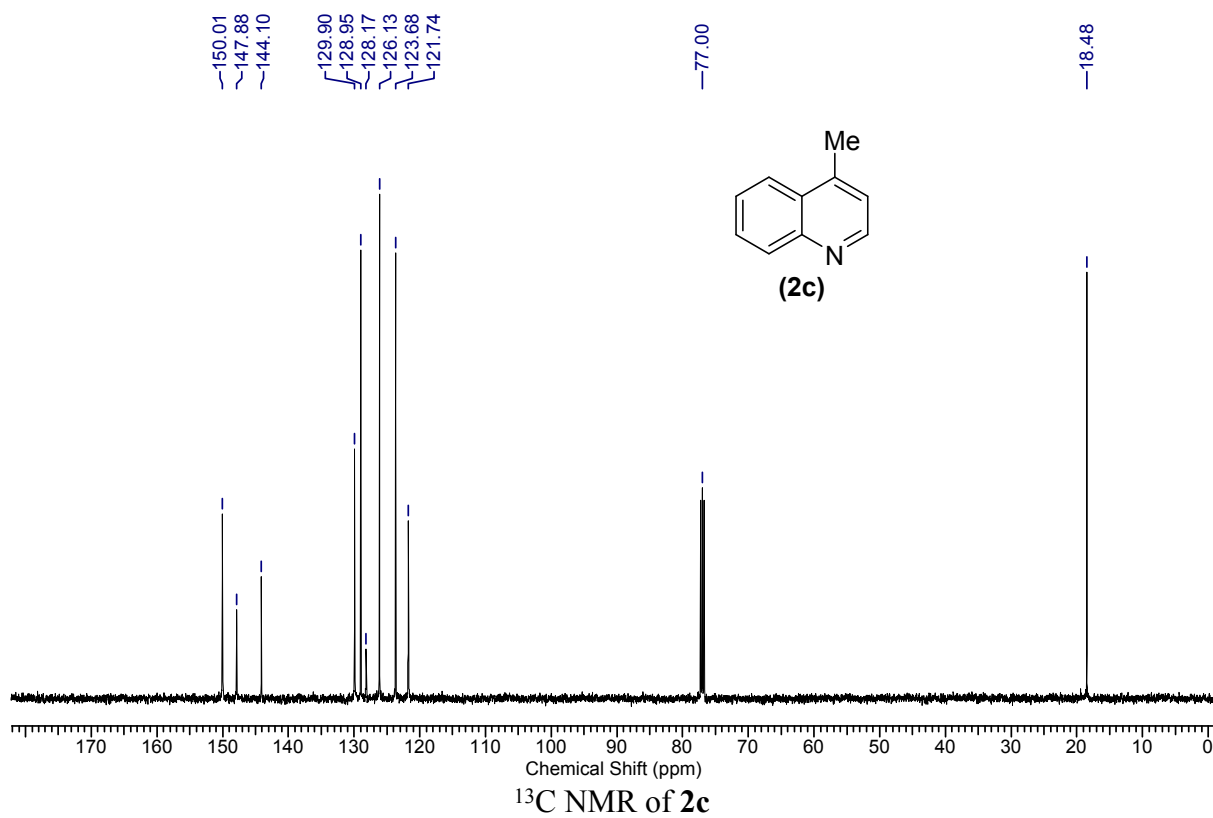

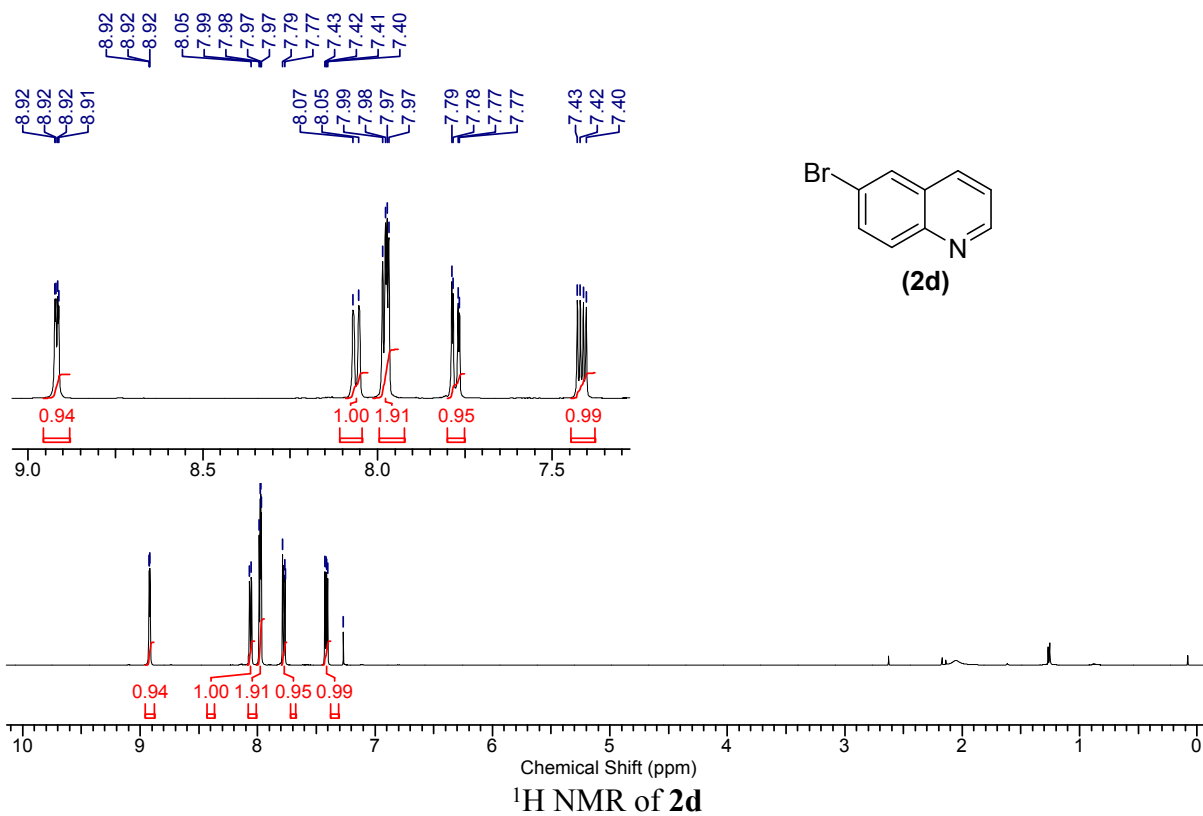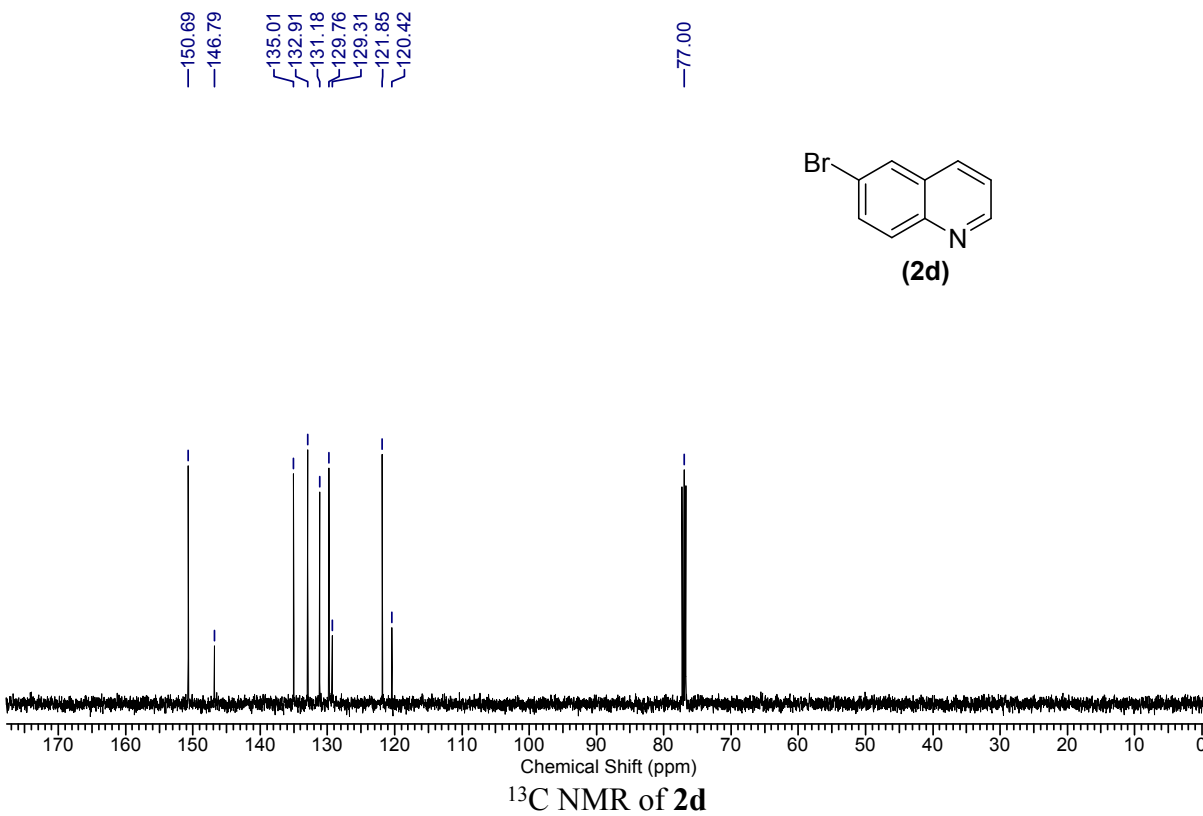

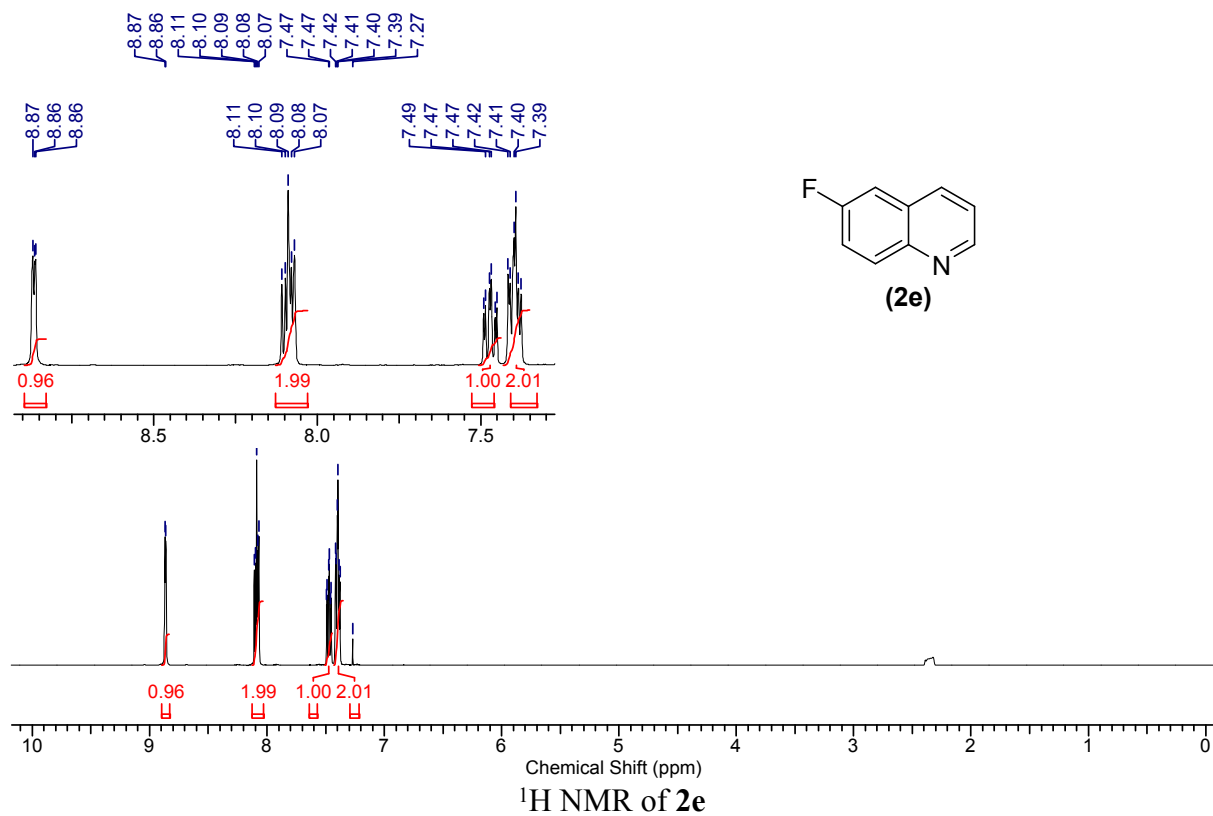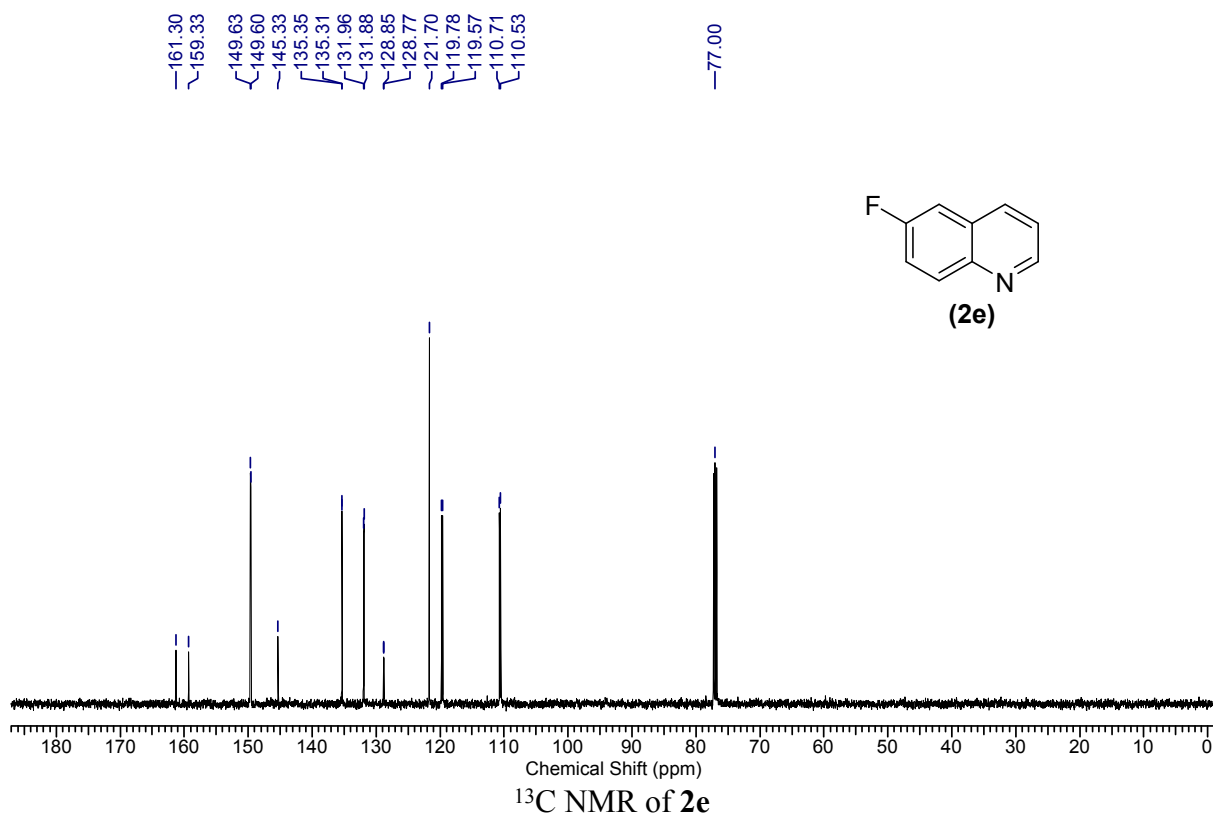

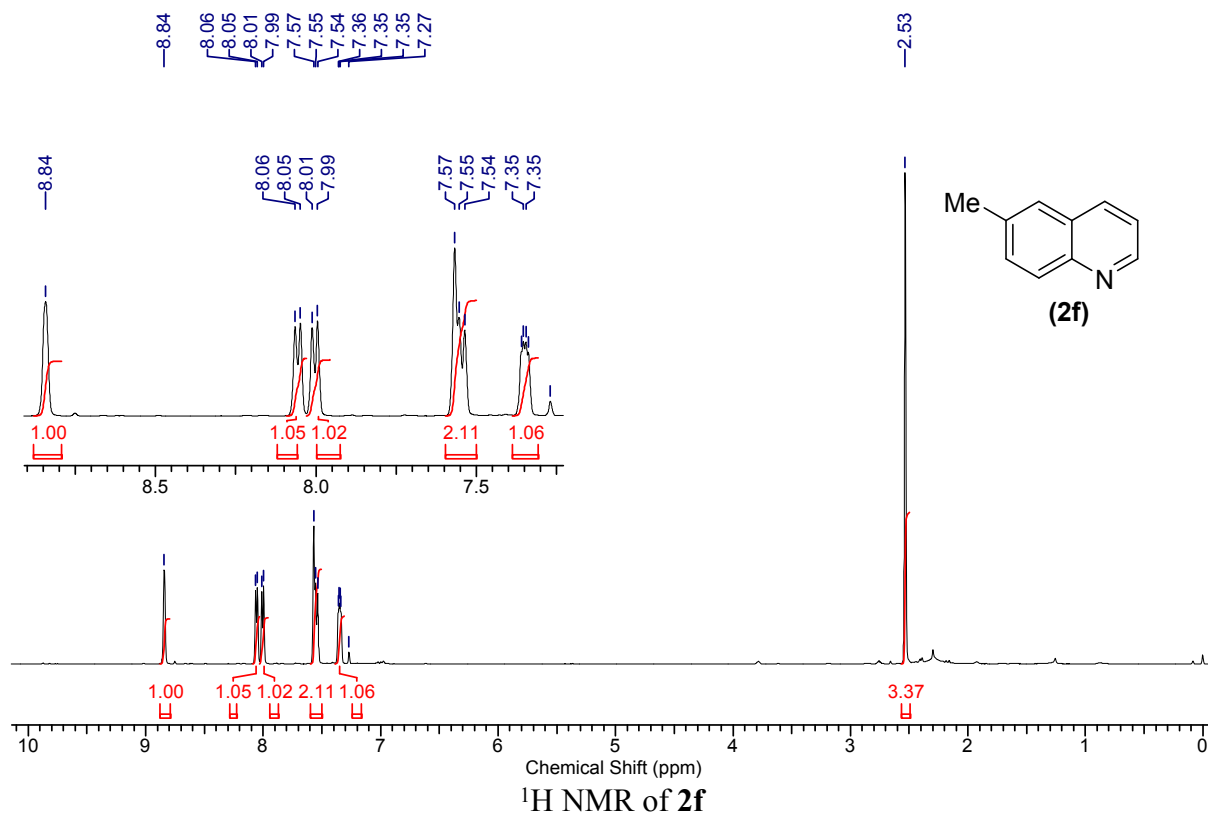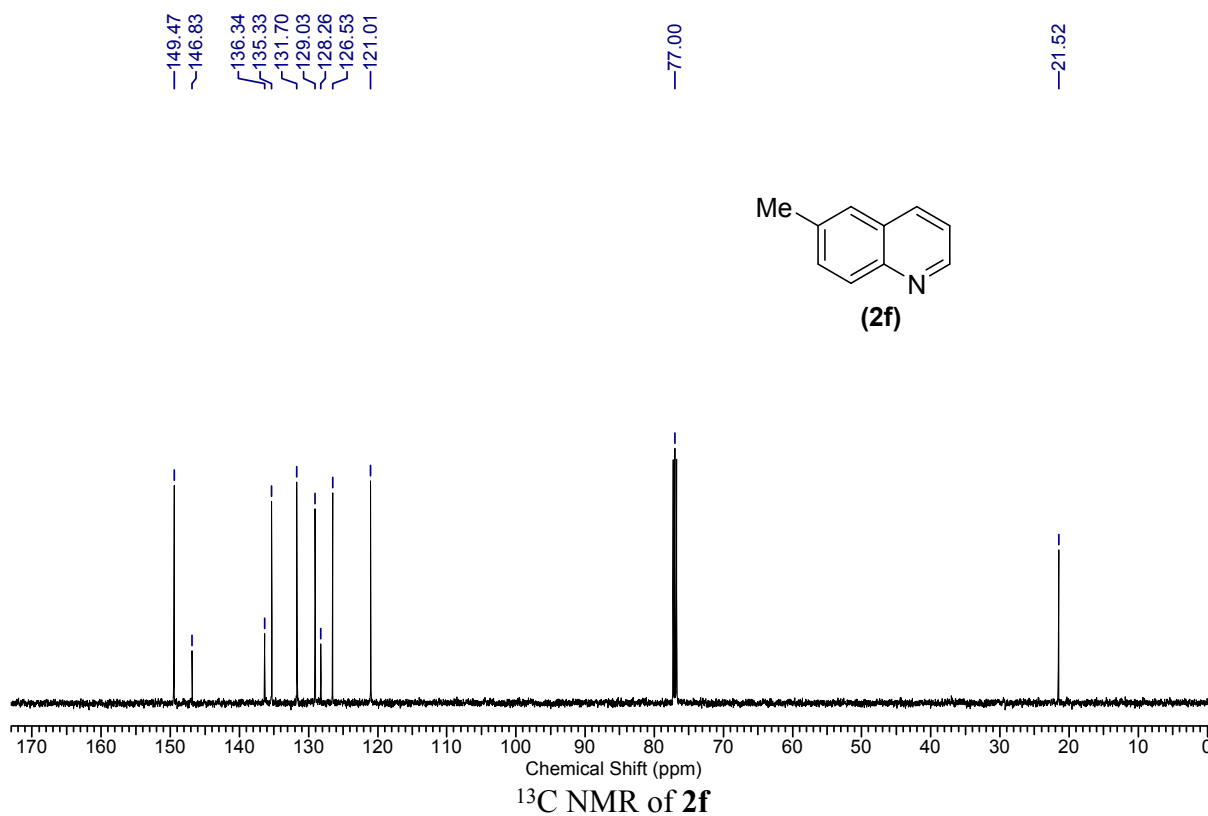

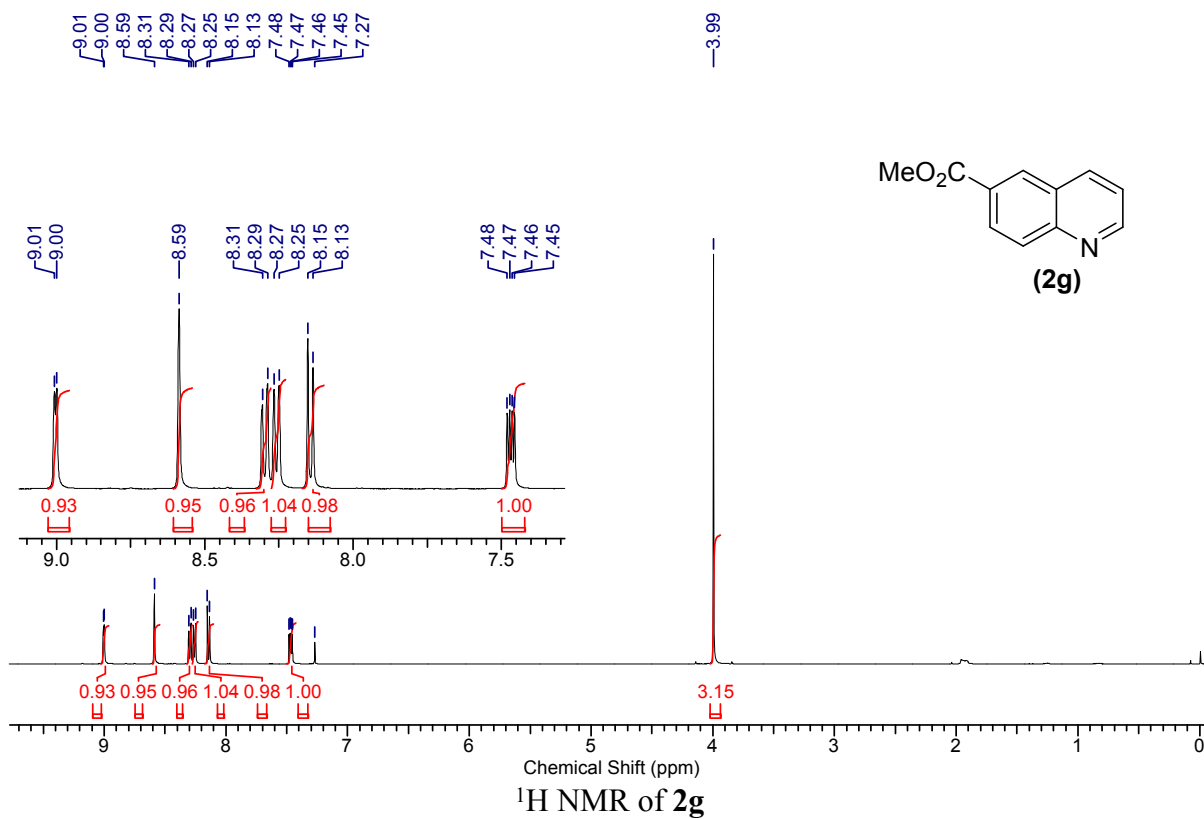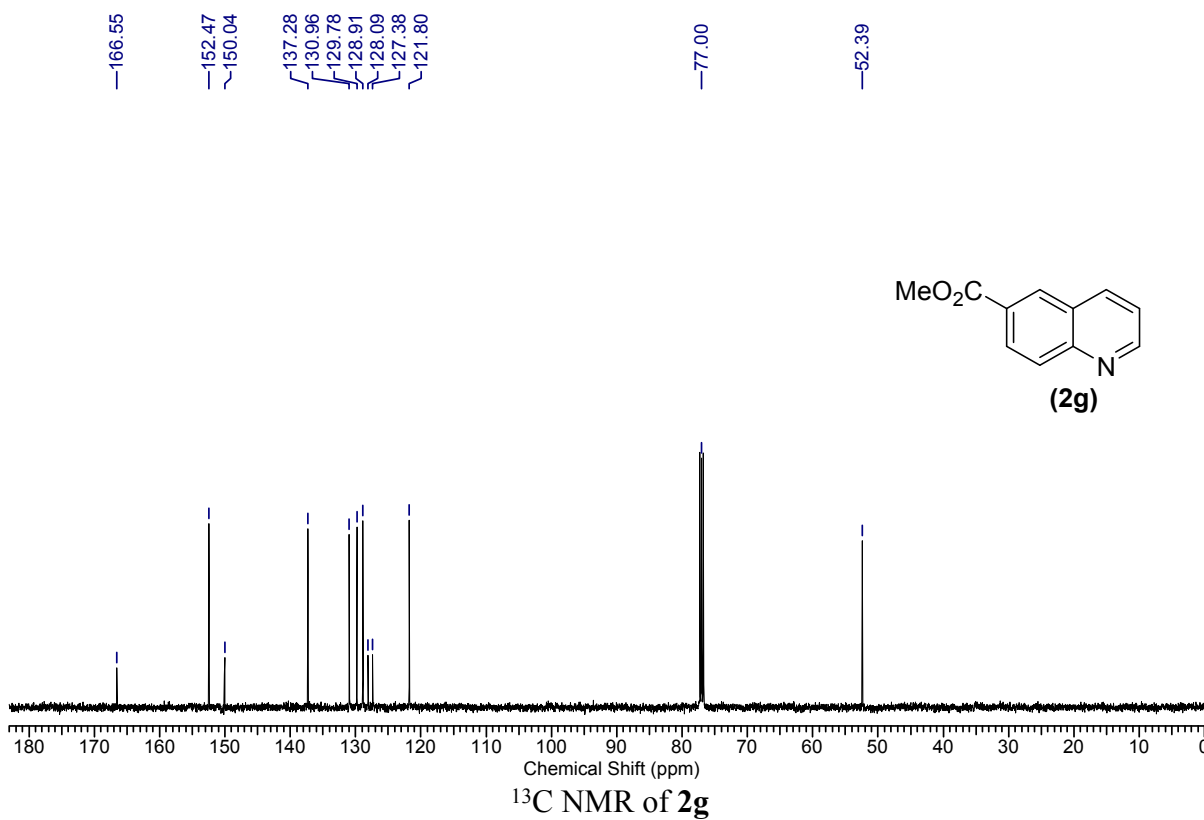

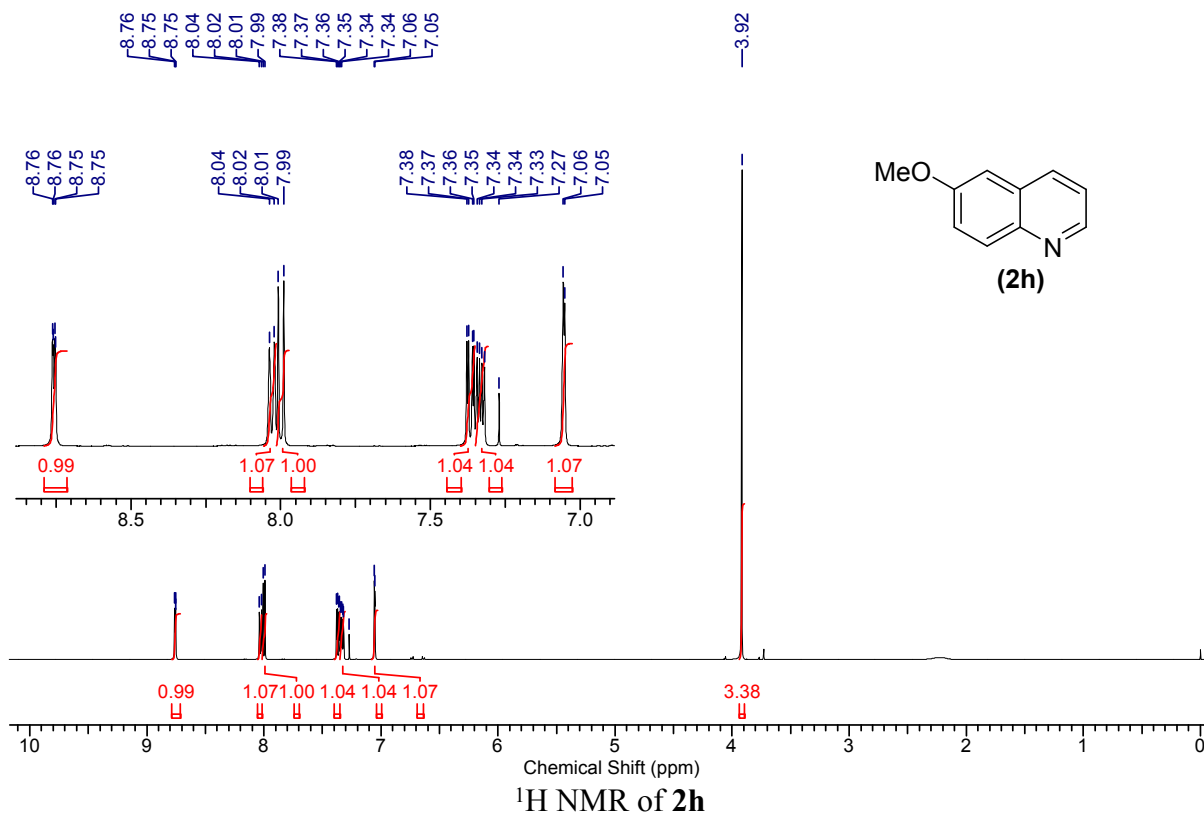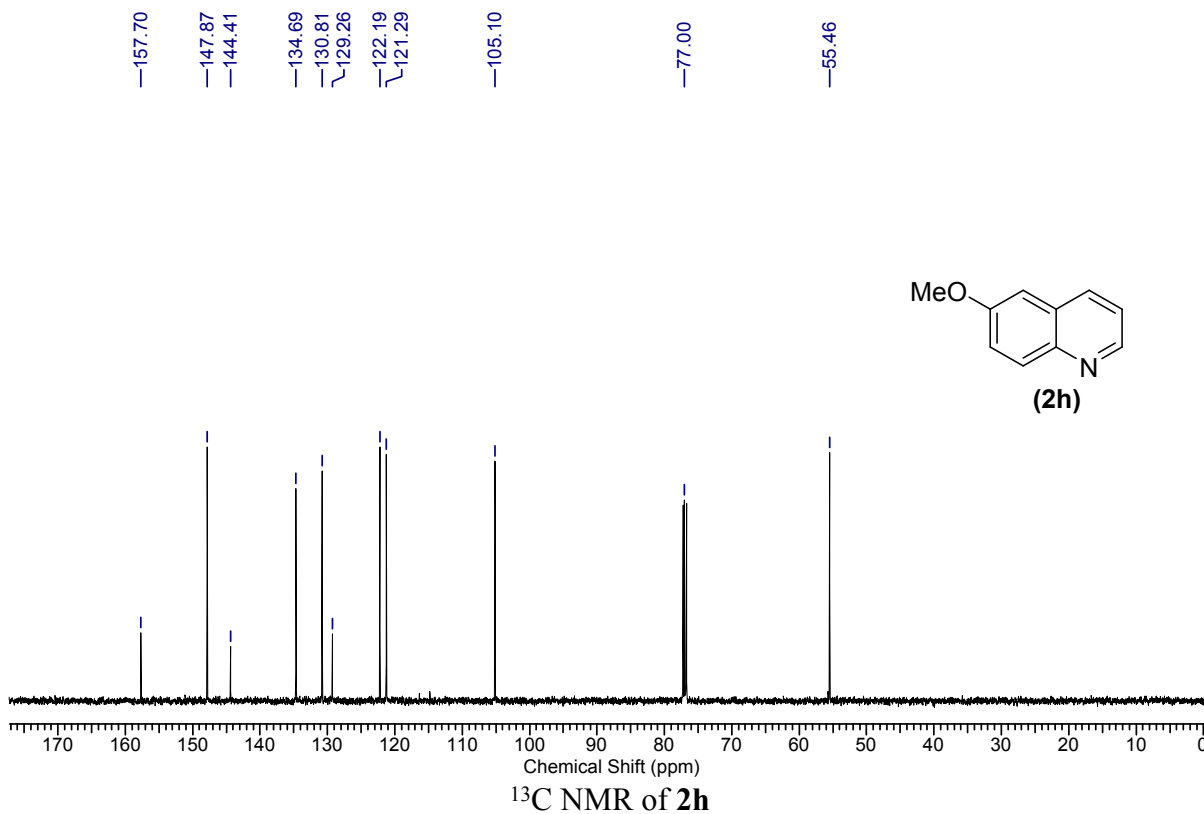

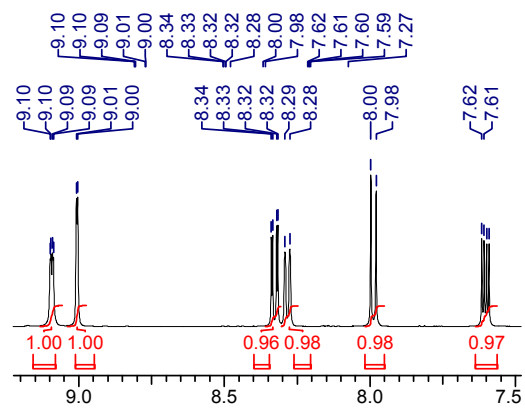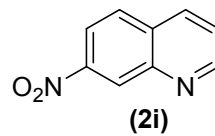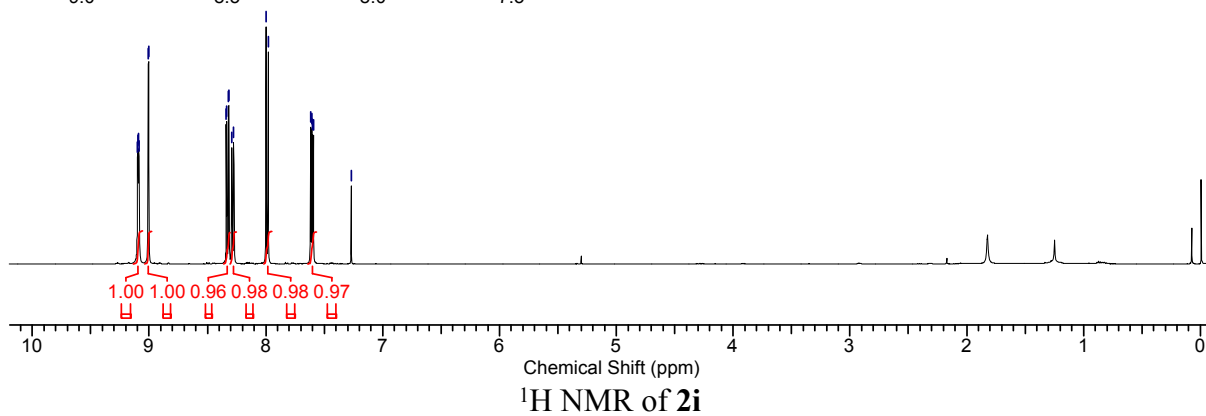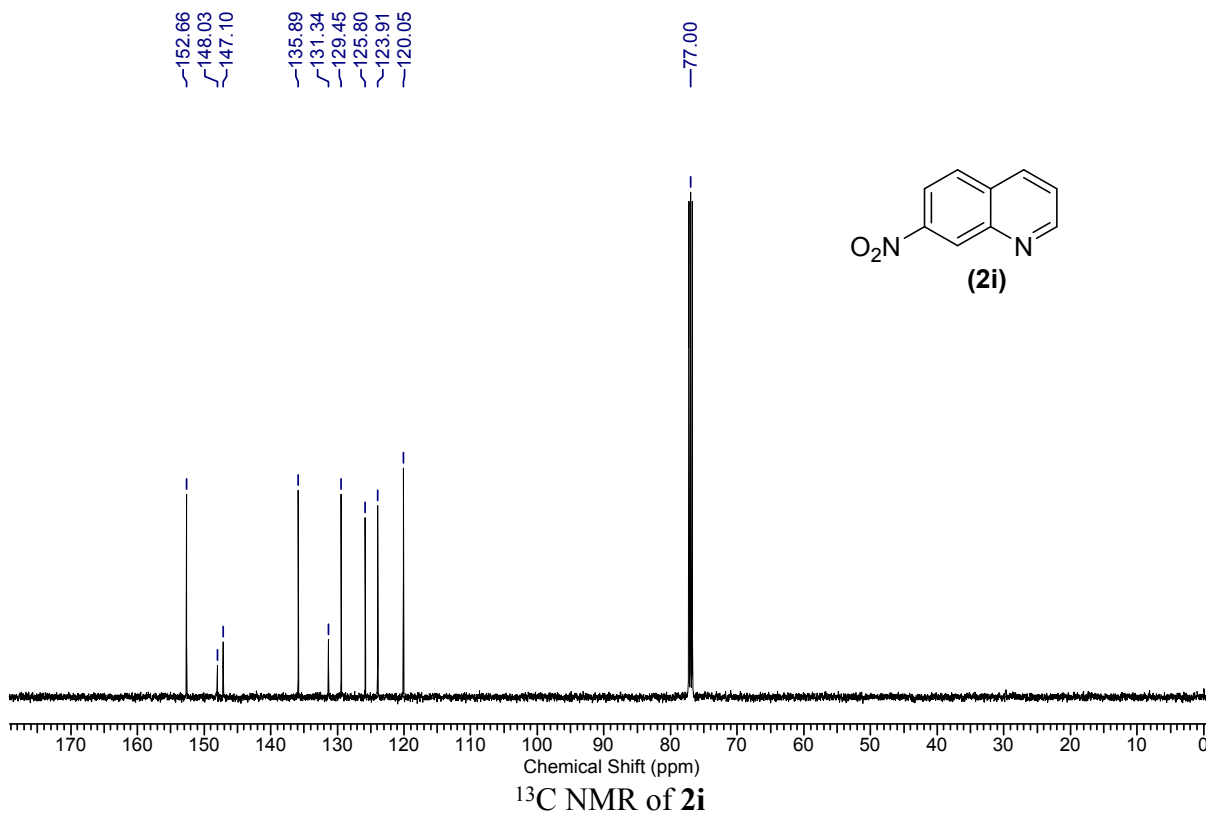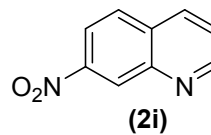



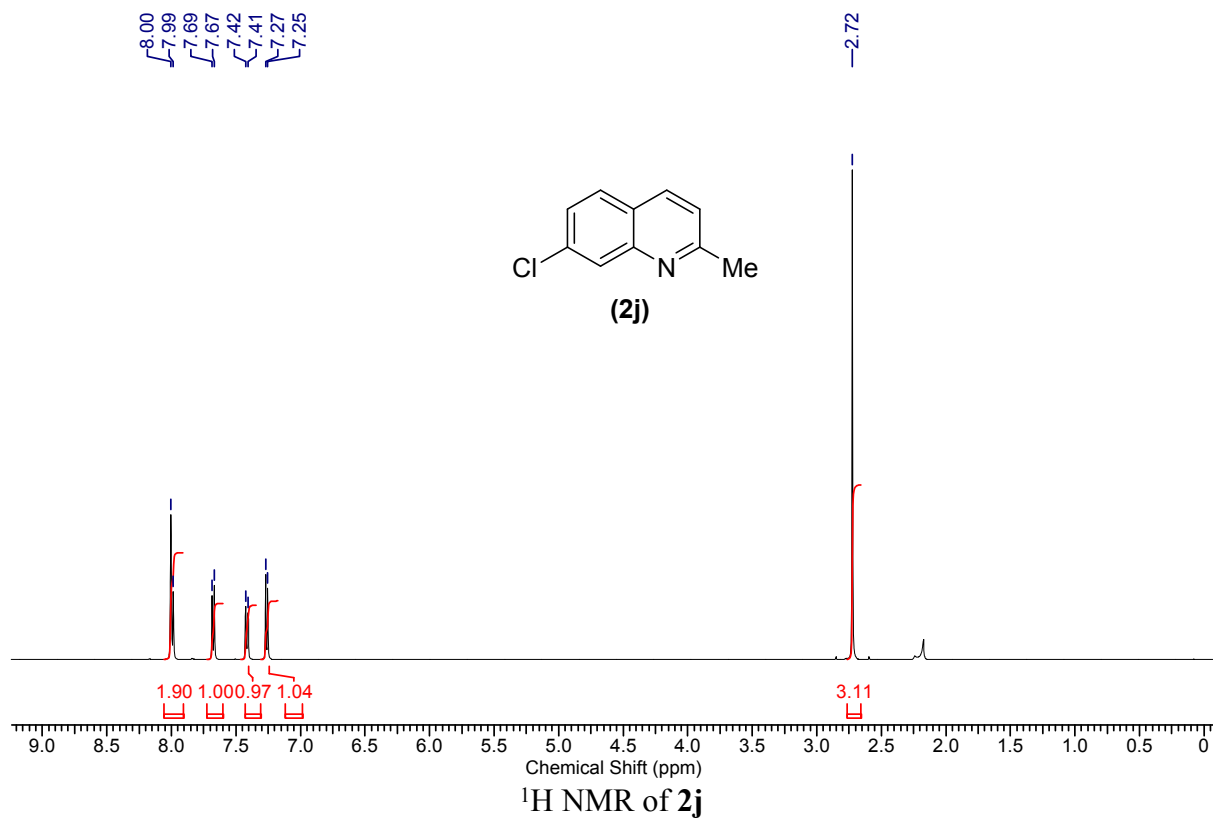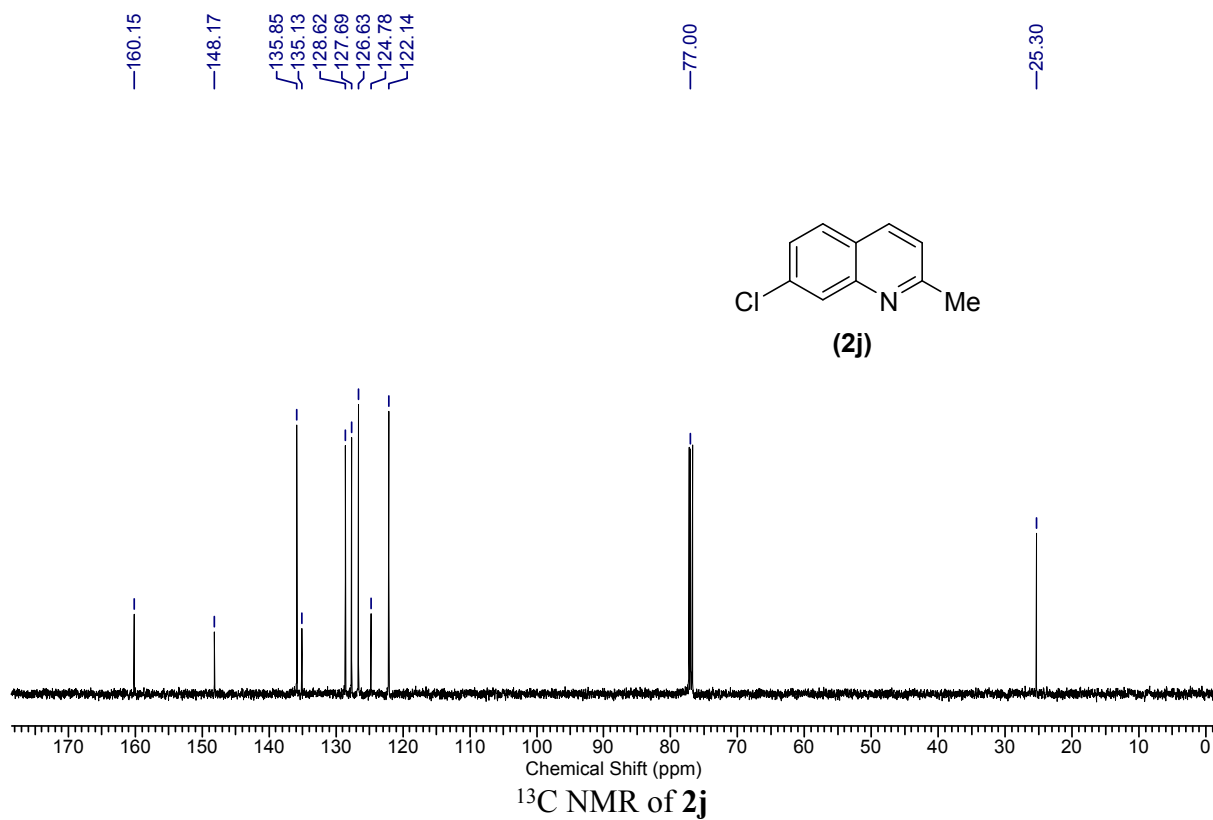

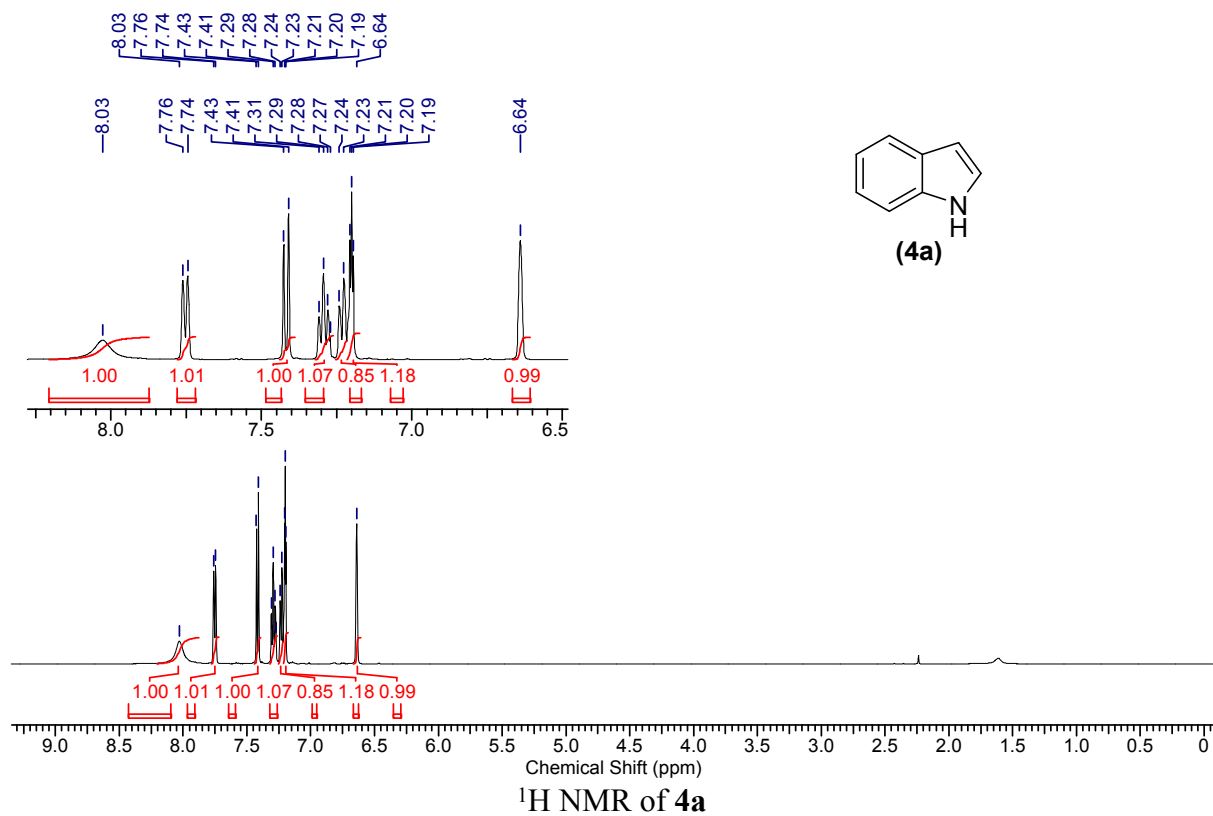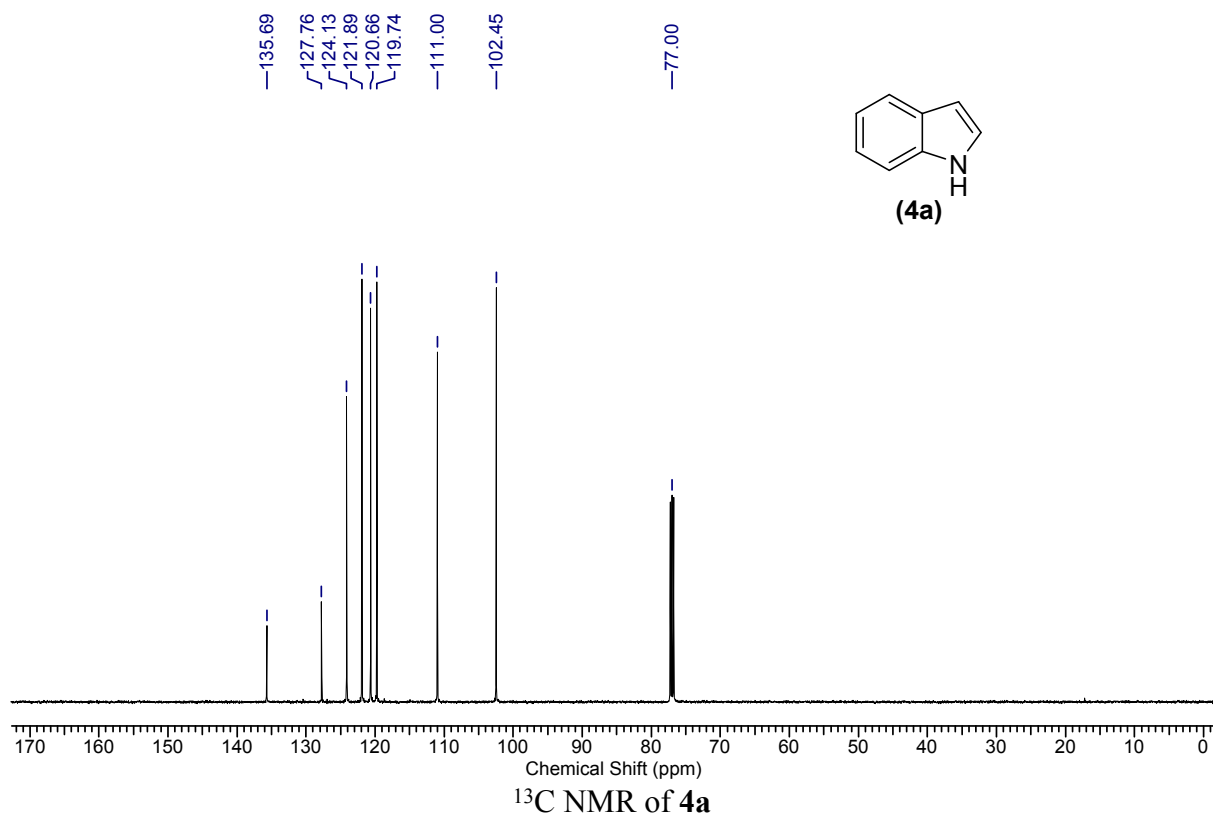

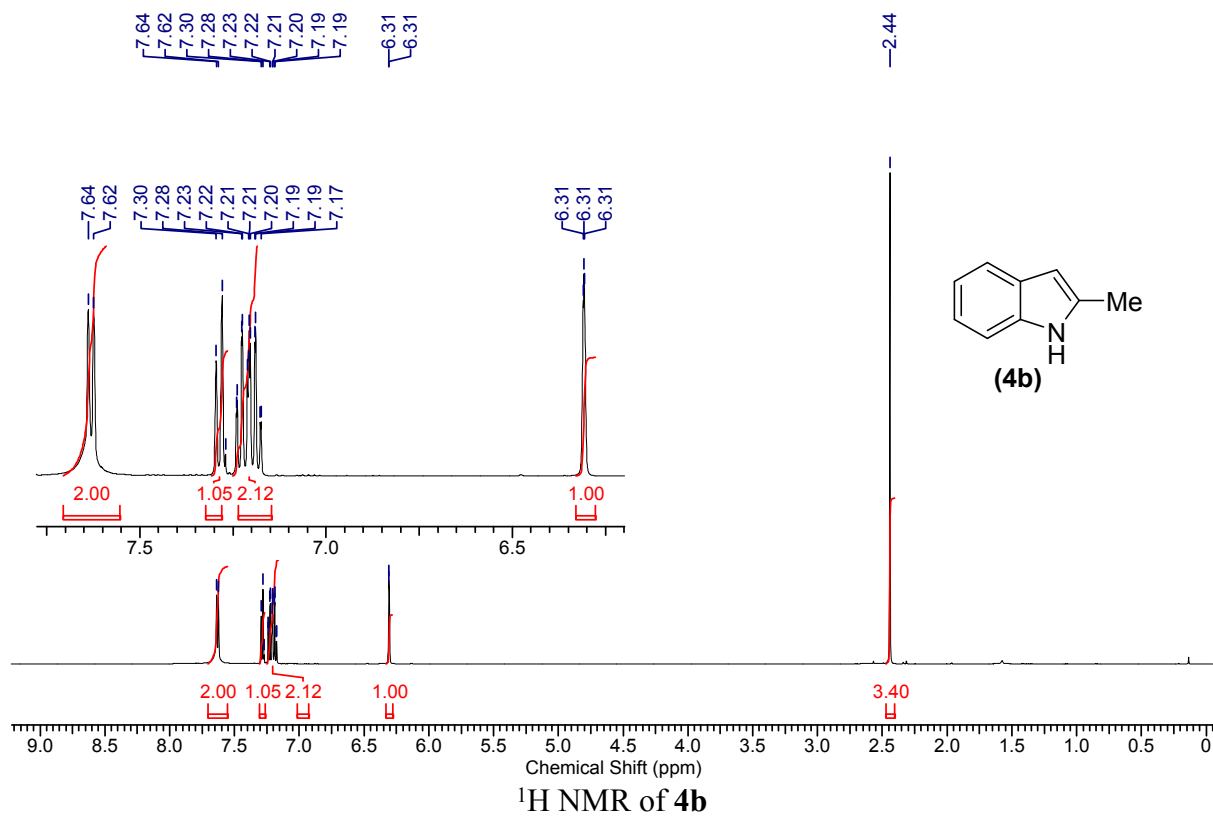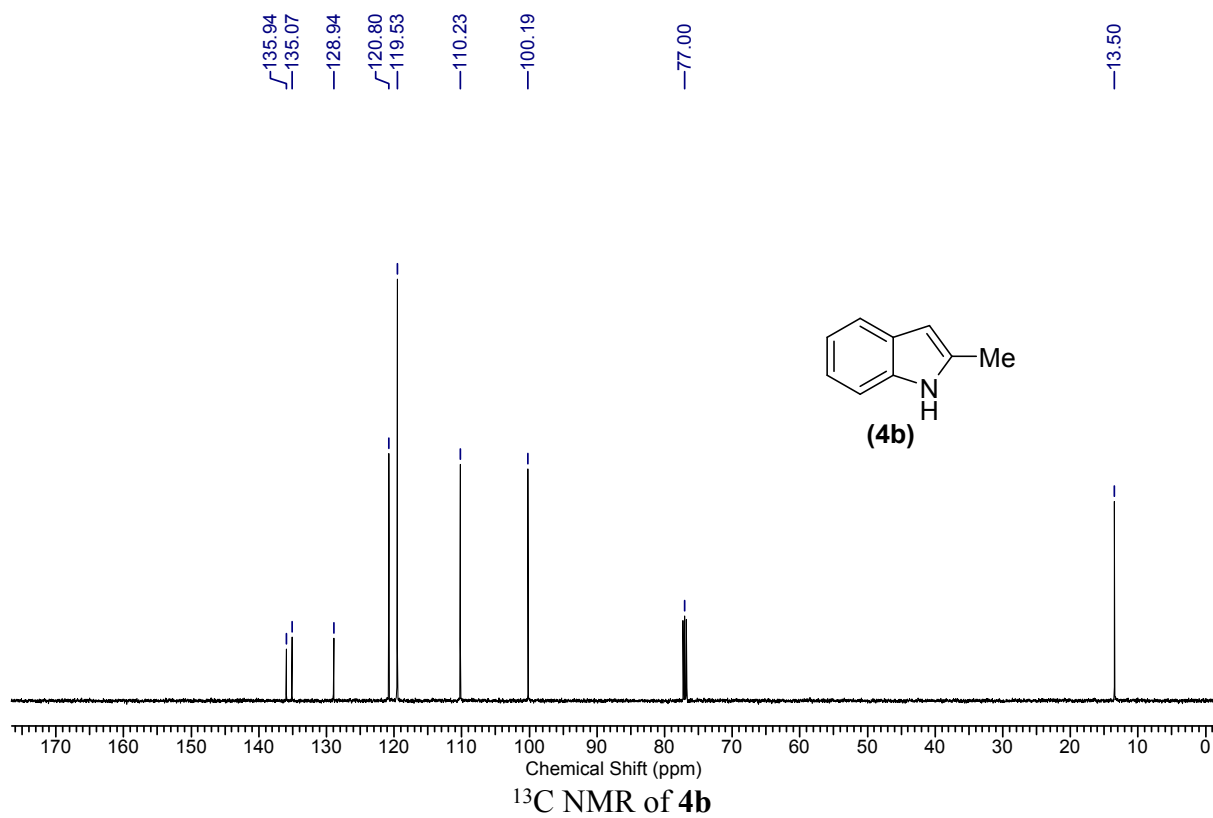

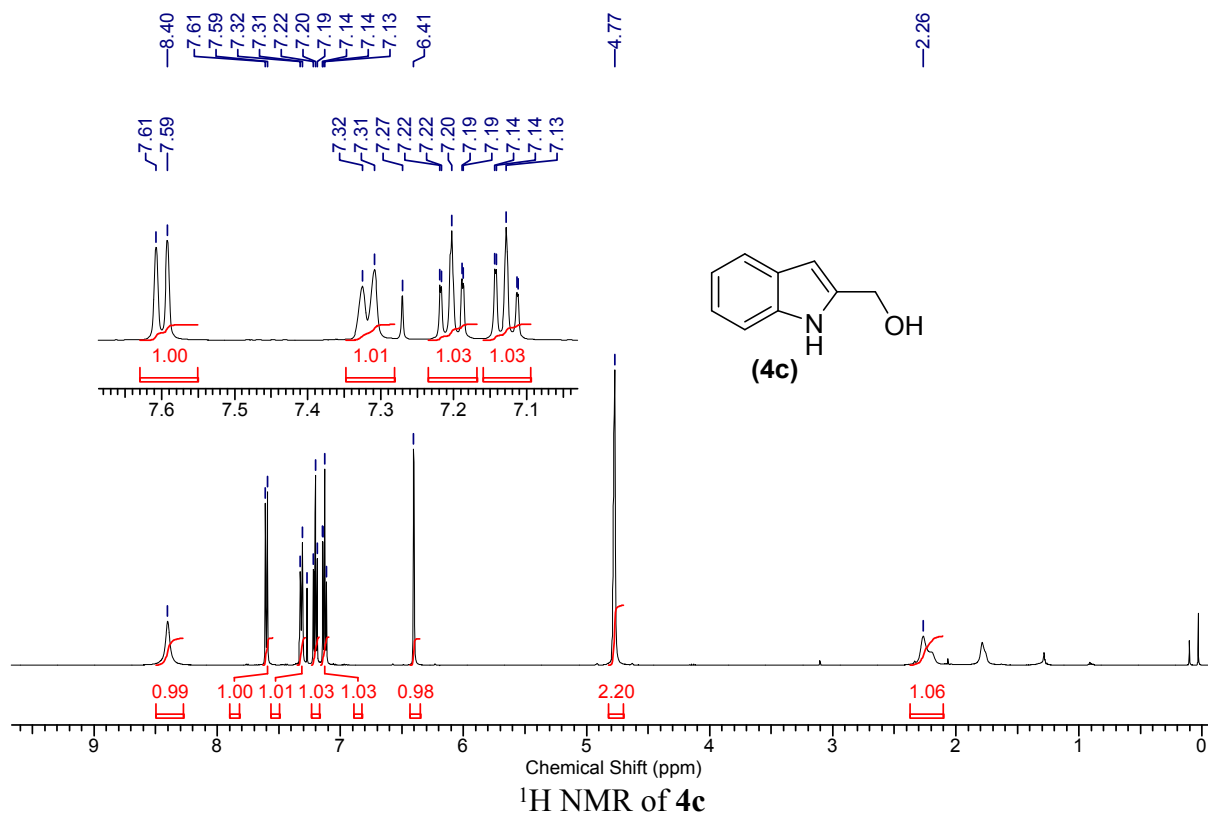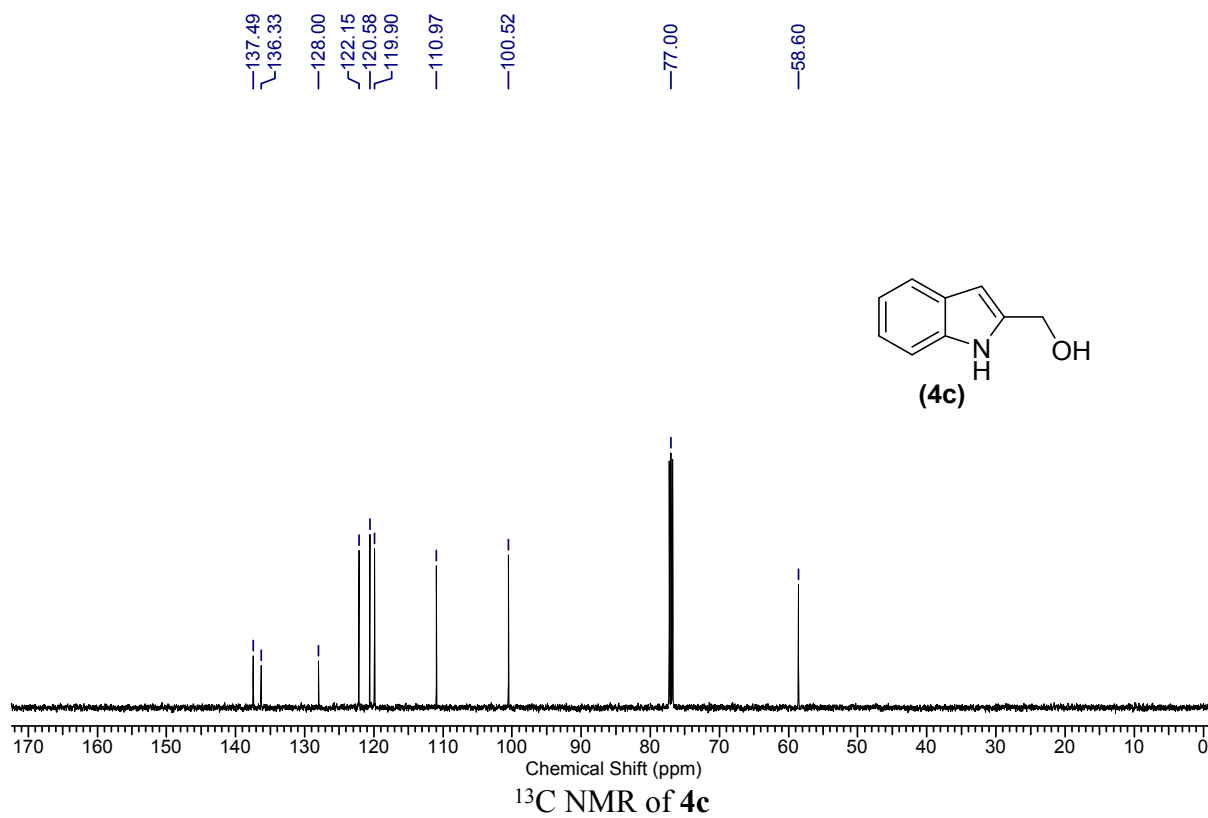

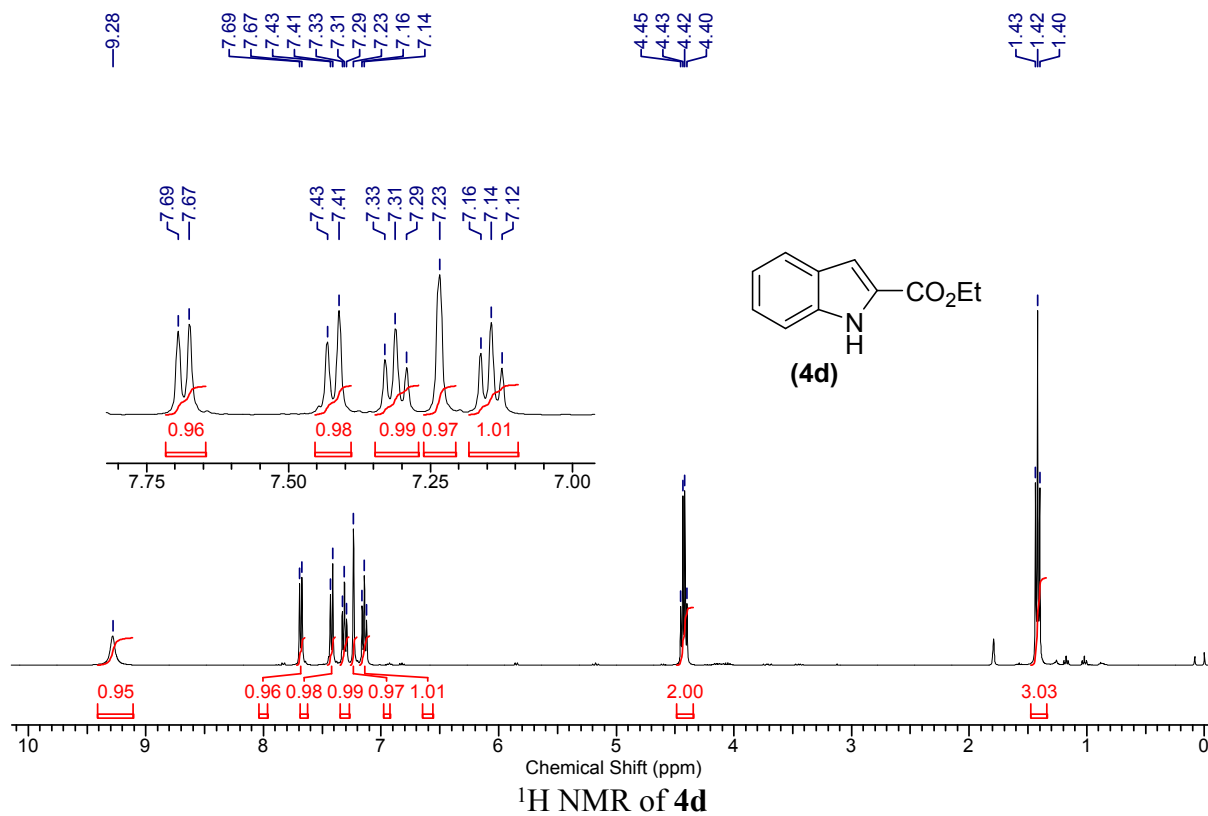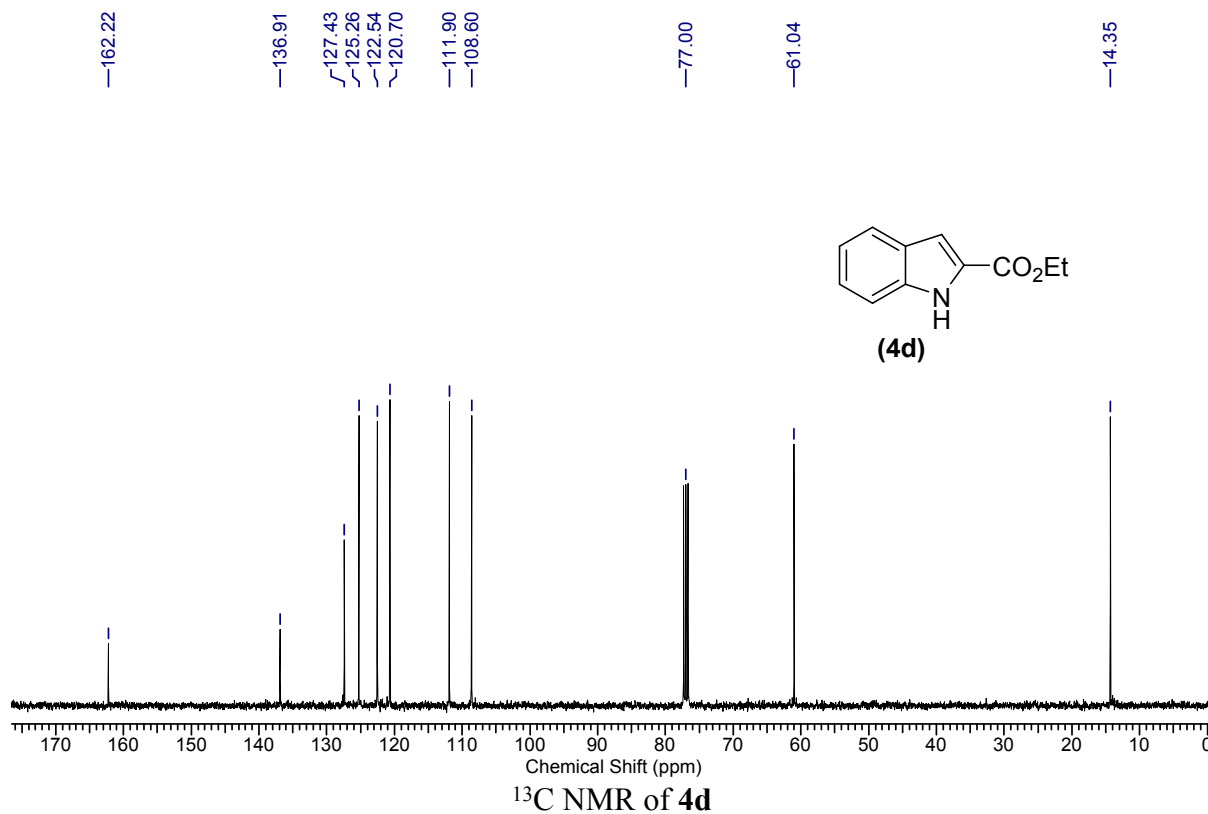

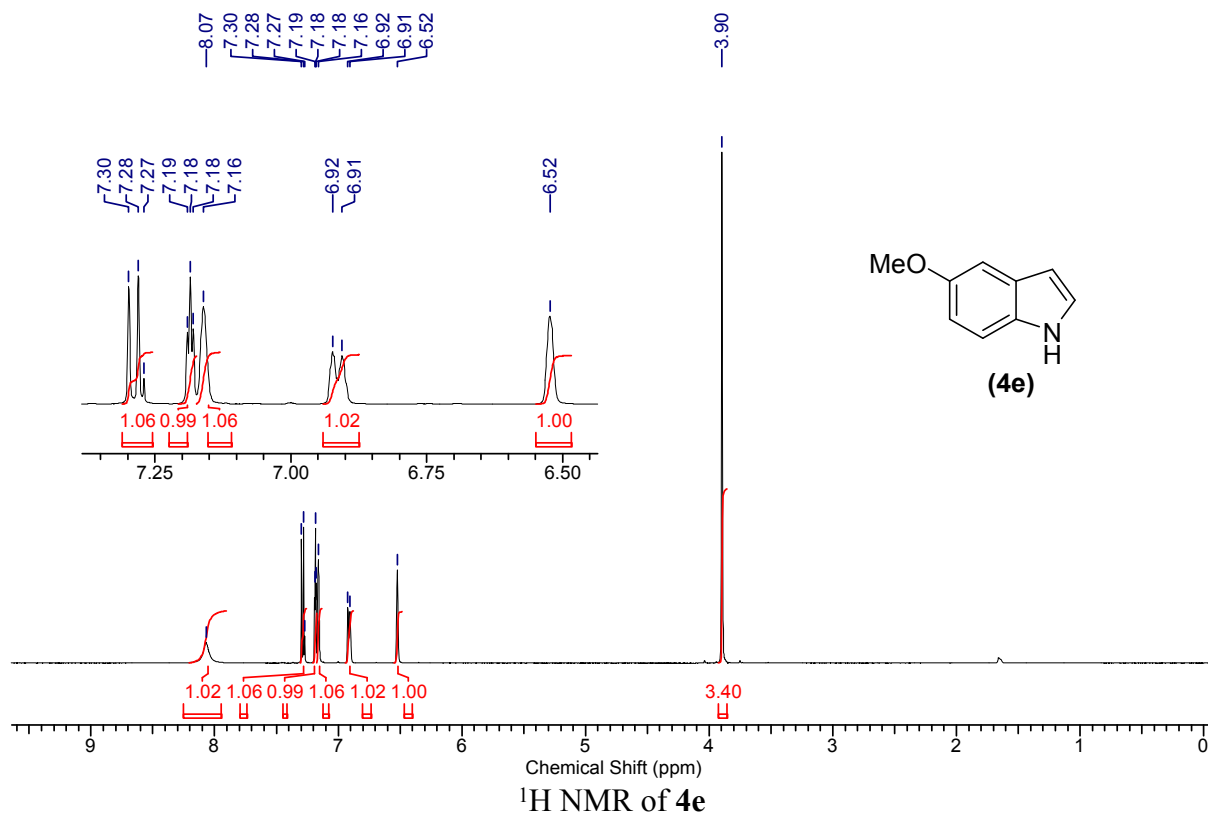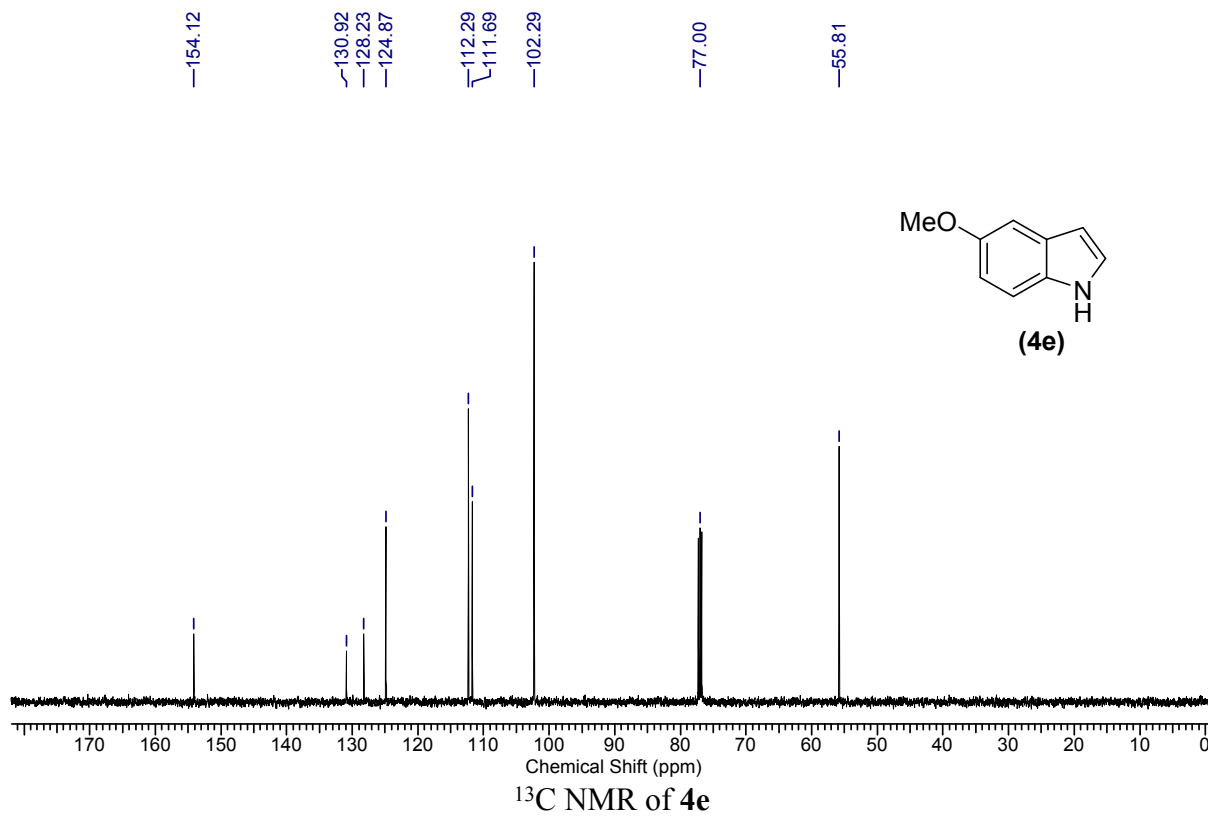

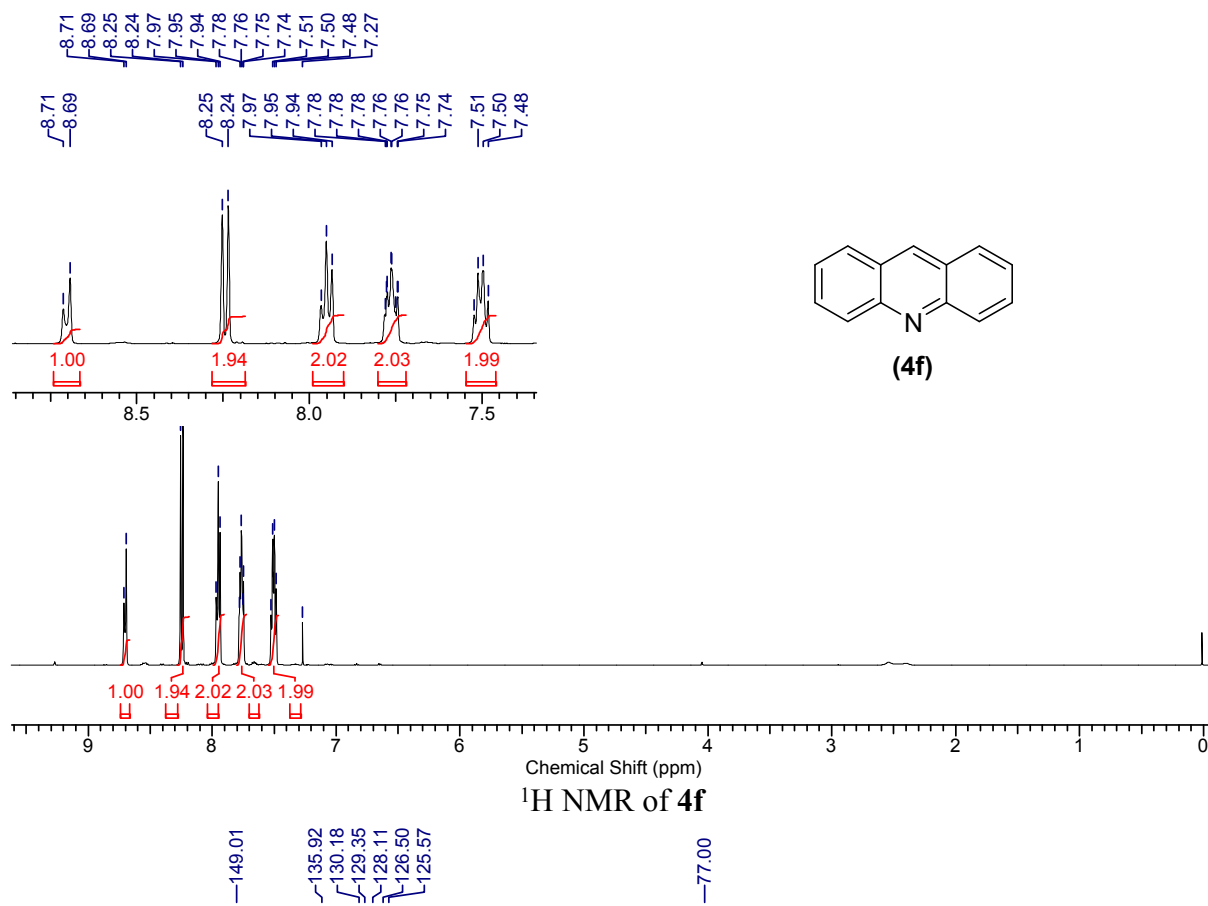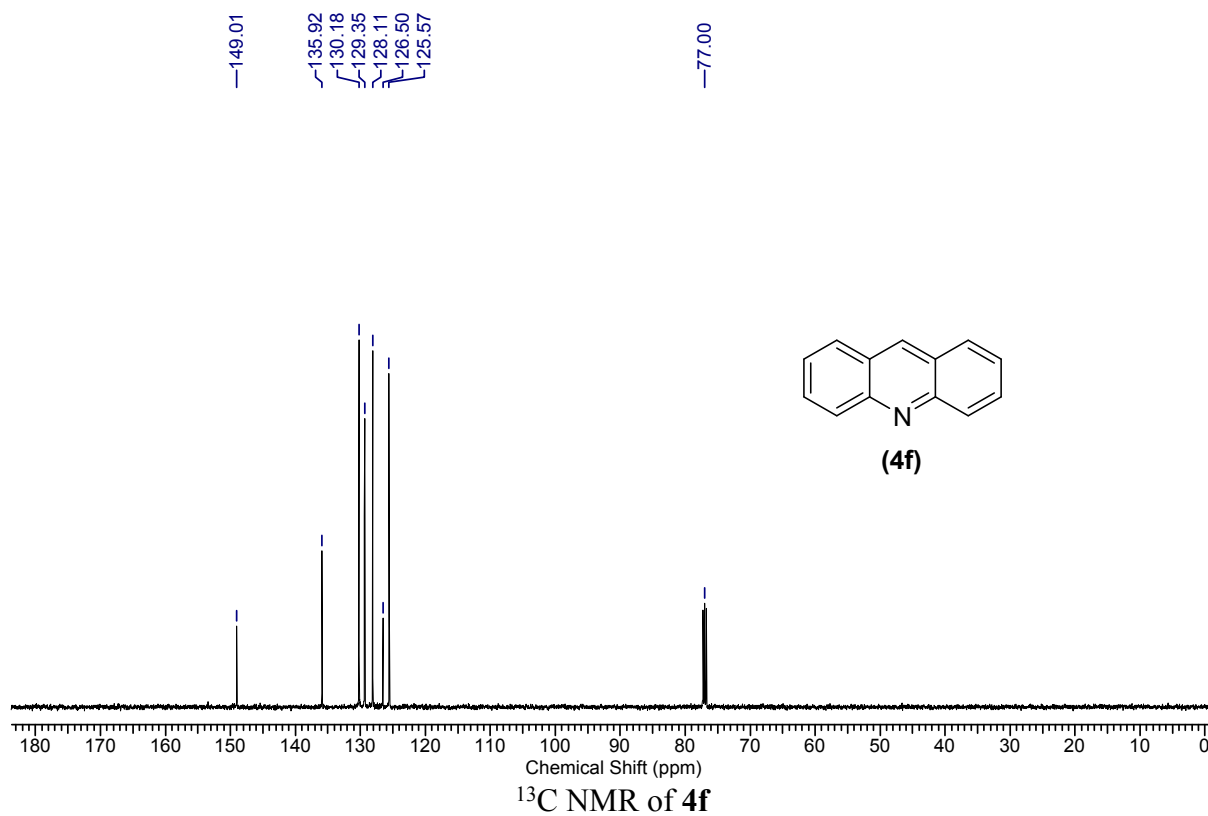

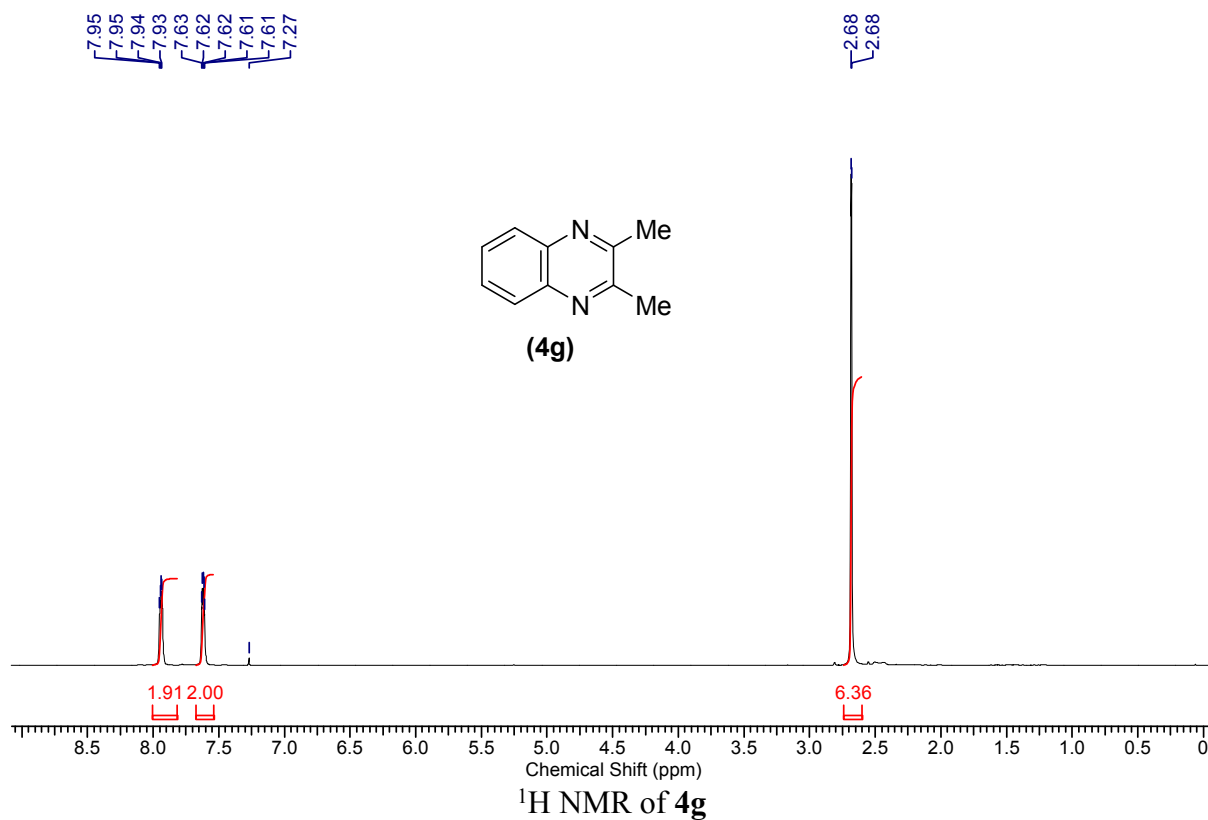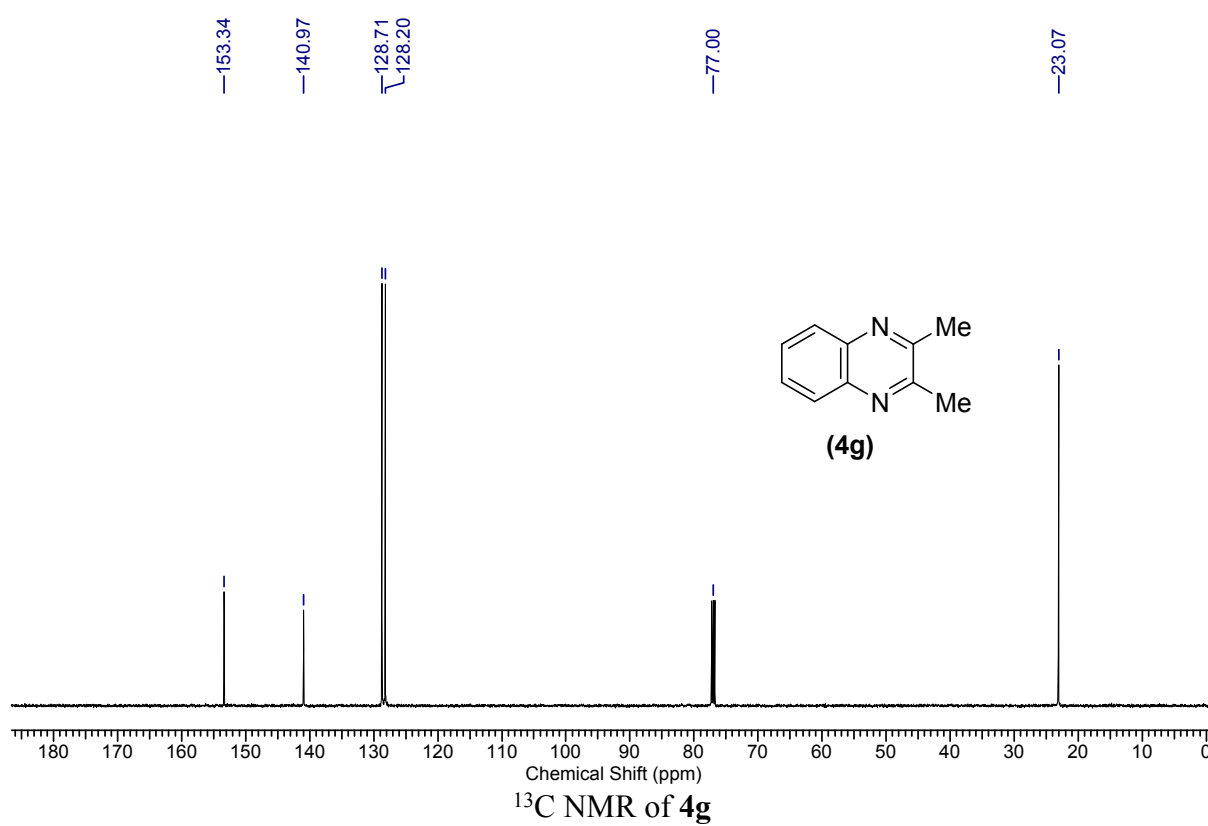



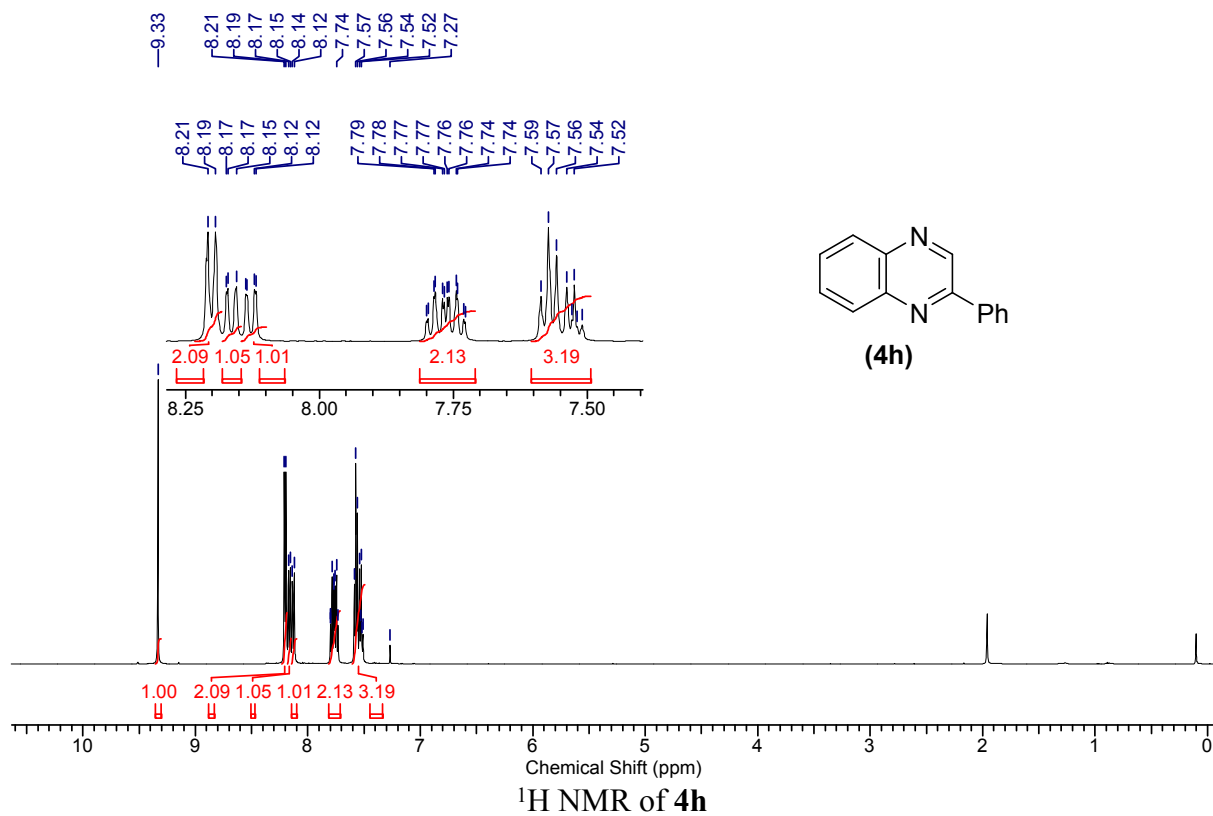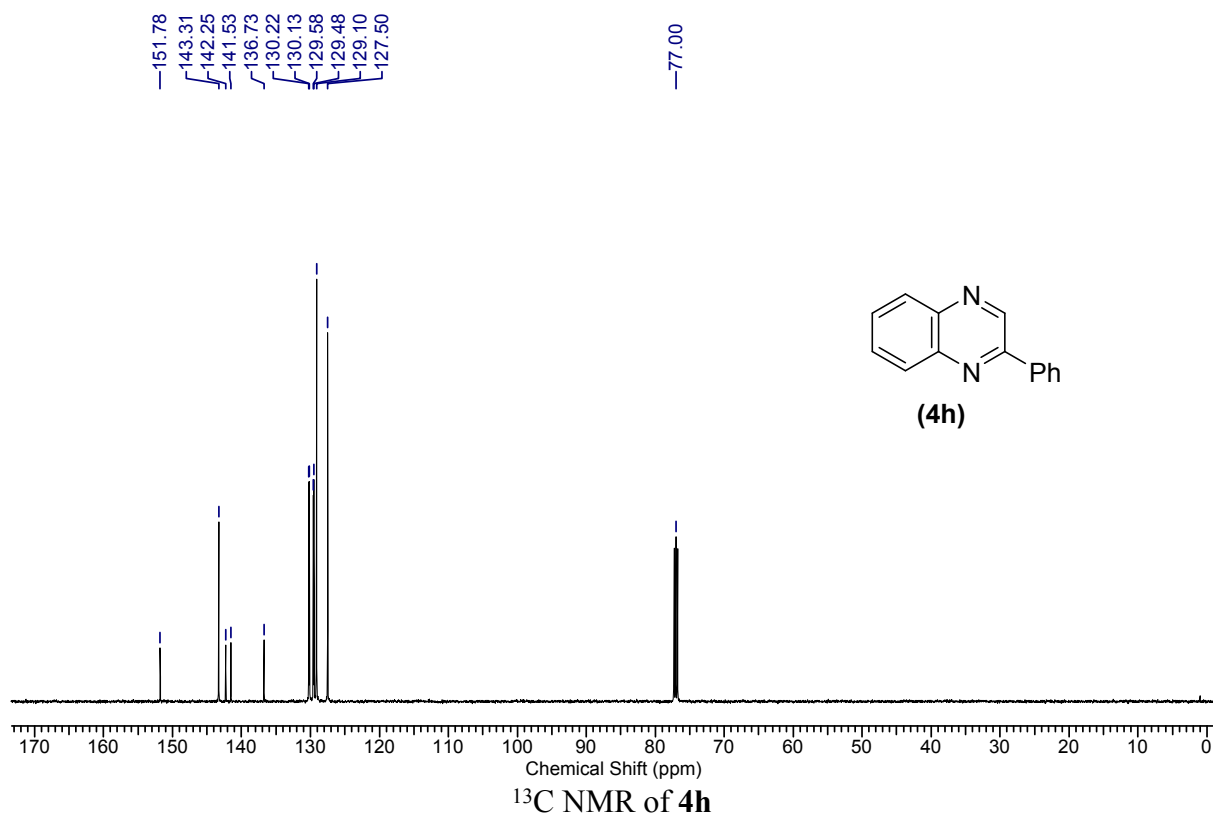

### 3. Copy of HRMS Data

200A116 #292 RT: 1.30 AV: 1 NL: 4.58E7  
T: FTMS + p ESI Full ms [100.0000-1500.0000]

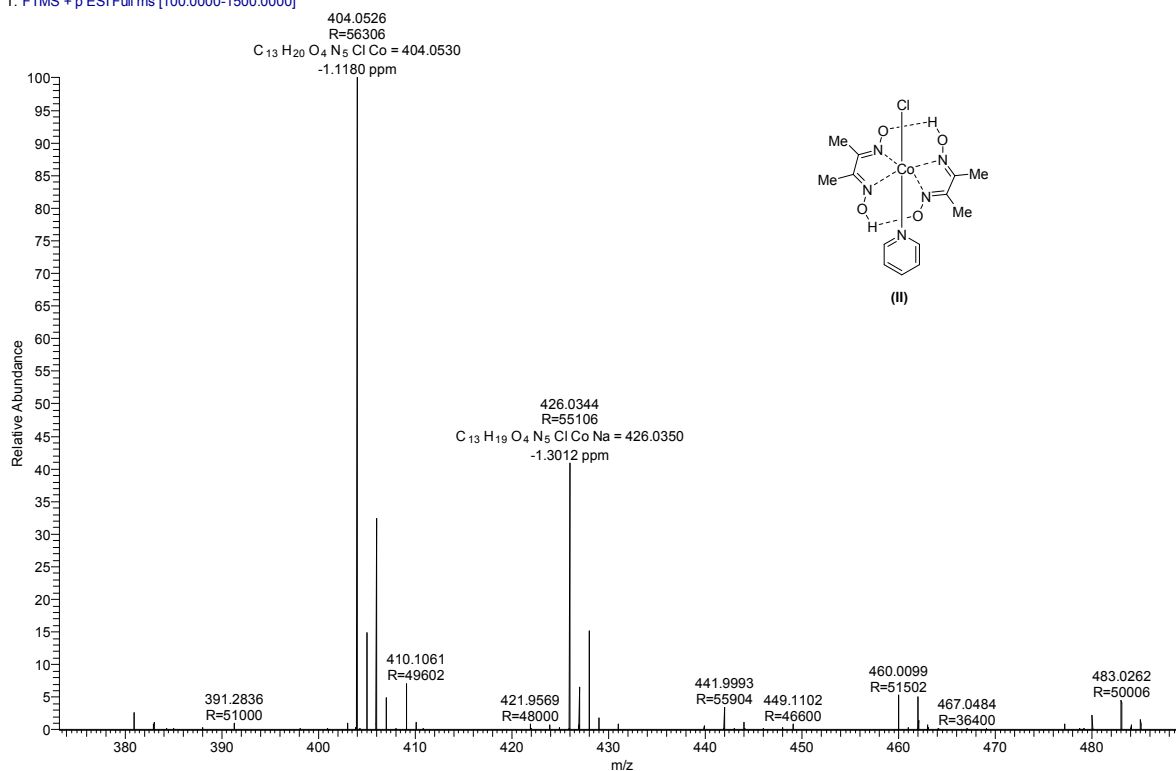

HRMS of II

200A122 #269 RT: 1.20 AV: 1 NL: 4.88E8  
T: FTMS + p ESI Full ms [100.0000-1500.0000]

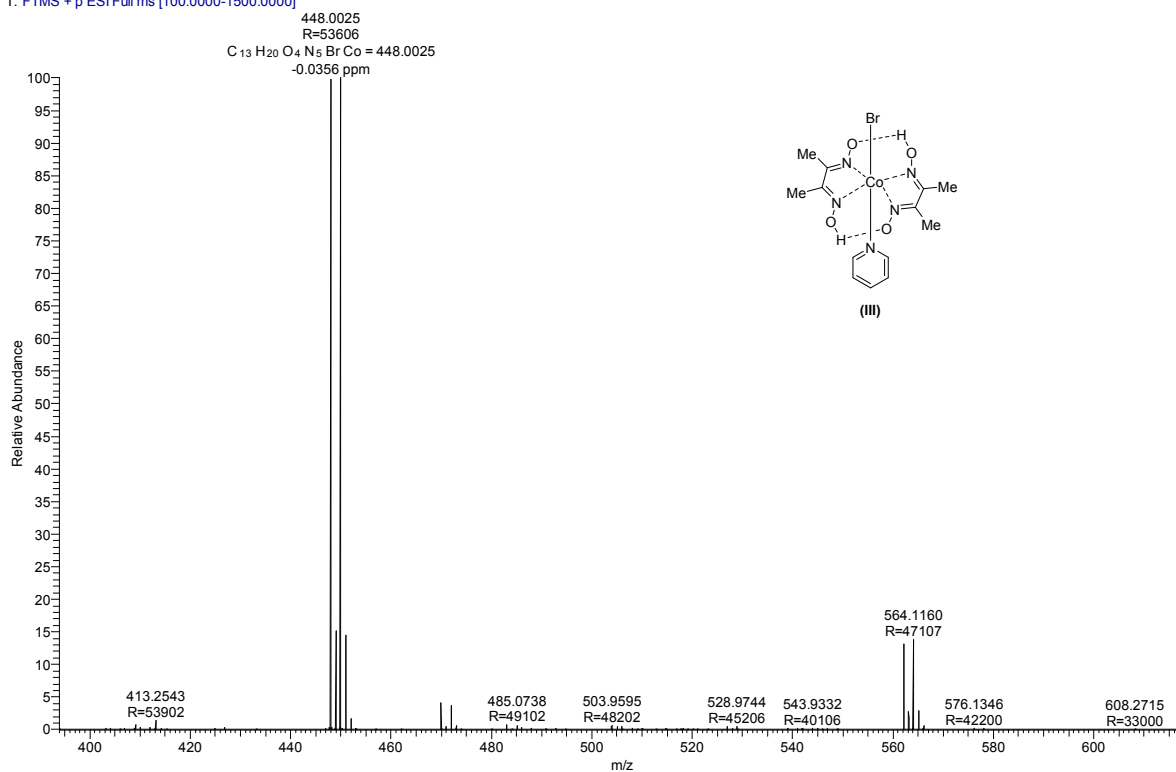

HRMS of III

200A123 #294 RT: 1.31 AV: 1 NL: 9.84E7  
T: FTMS + p ESI Full ms [100.0000-1500.0000]

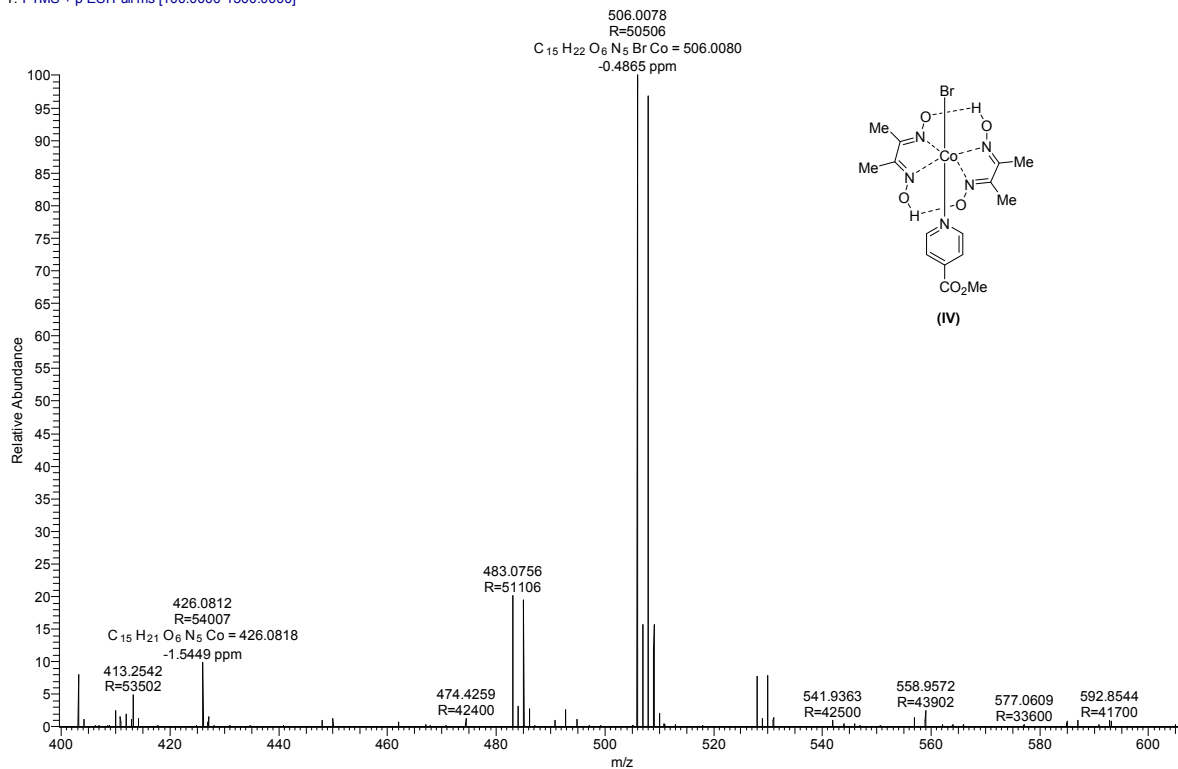

### HRMS of IV

370-A #97 RT: 0.43 AV: 1 NL: 7.59E8  
T: FTMS + p ESI Full ms [100.00-1500.00]

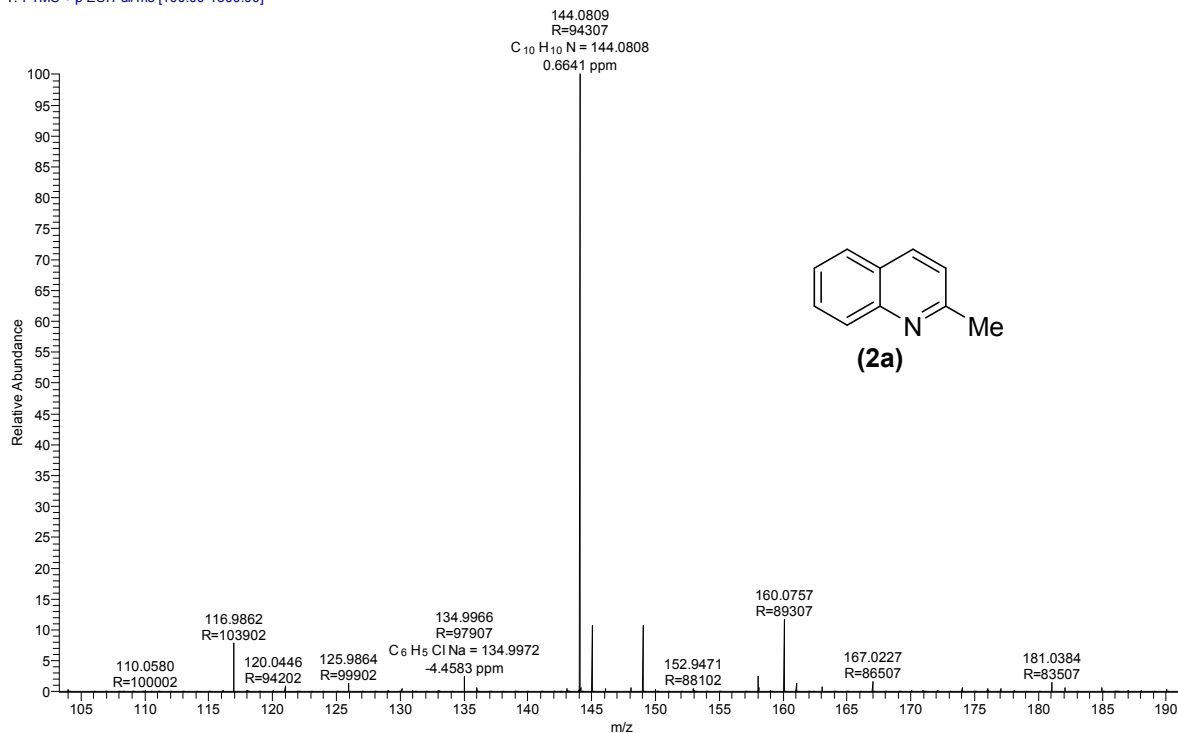

### HRMS of 2a

MKS-2G #110 RT: 0.49 AV: 1 NL: 9.19E9  
T: FTMS + p ESI Full ms [100.00-1500.00]

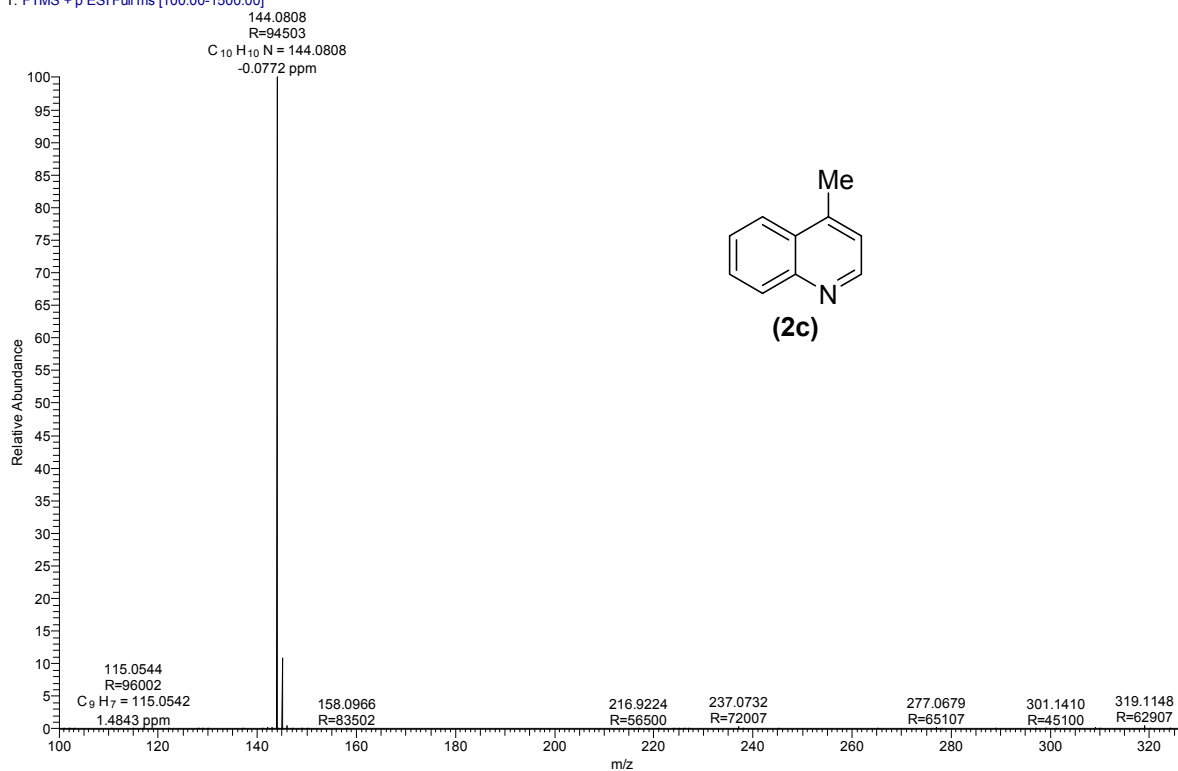

### HRMS of 2c

372-A88 #115 RT: 0.51 AV: 1 NL: 3.00E9  
T: FTMS + p ESI Full ms [100.00-1500.00]

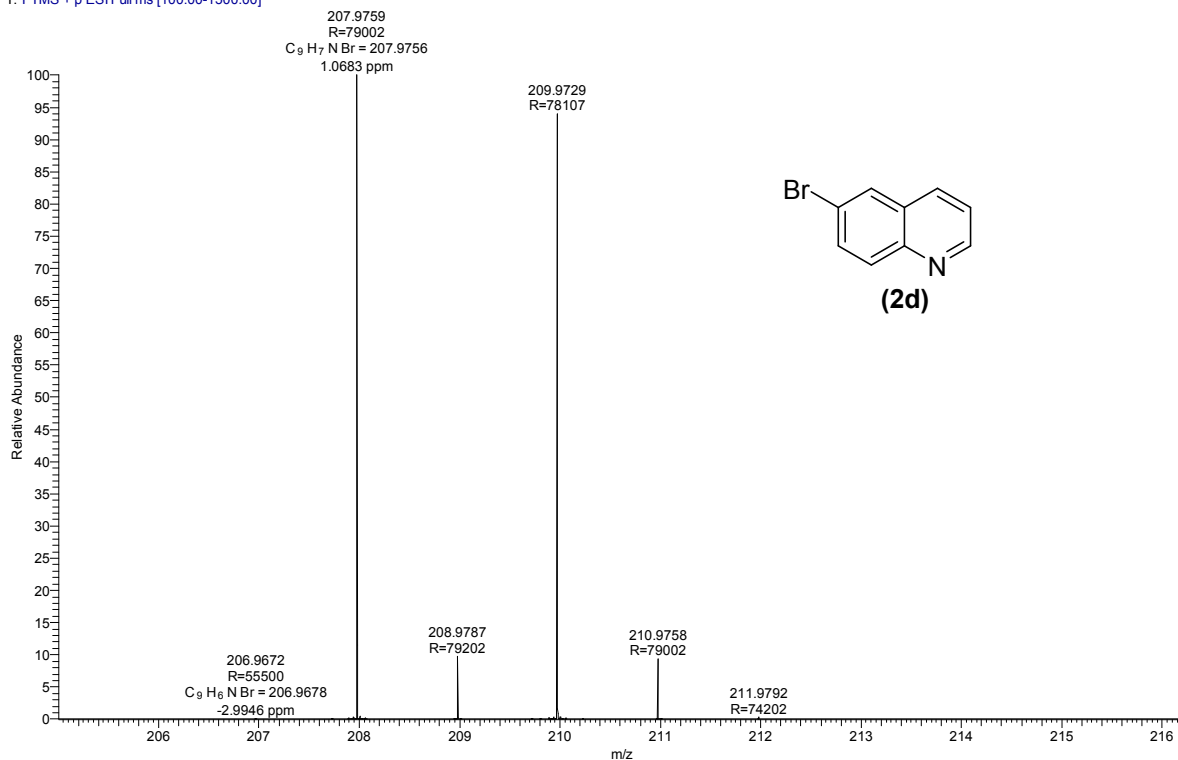

### HRMS of 2d

200B106 #353-355 RT: 1.57-1.58 AV: 3 NL: 6.91E9  
T: FTMS + p ESI Full ms [100.0000-1500.0000]

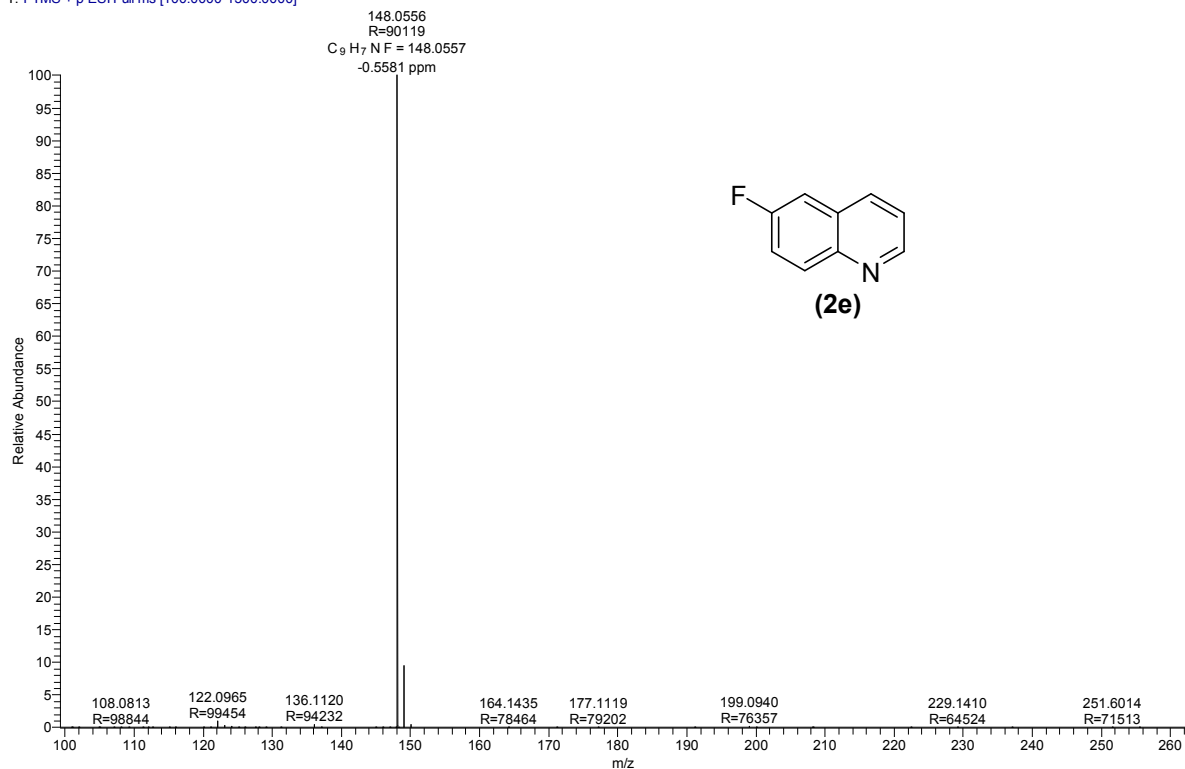

### HRMS of 2e

372-A7 #106 RT: 0.47 AV: 1 NL: 1.06E10  
T: FTMS + p ESI Full ms [100.00-1500.00]

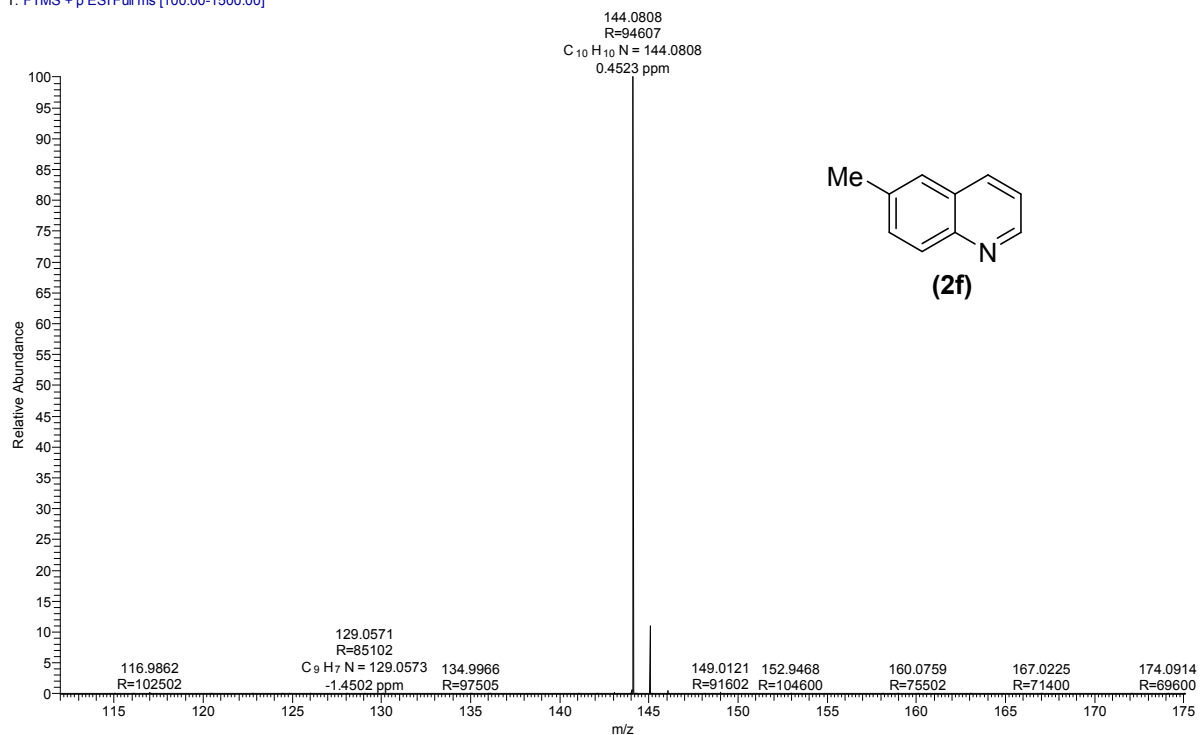

### HRMS of 2f

372-ABI#106 RT: 0.47 AV: 1 NL: 1.03E10  
T: FTMS + p ESI Full ms [100.00-1500.00]

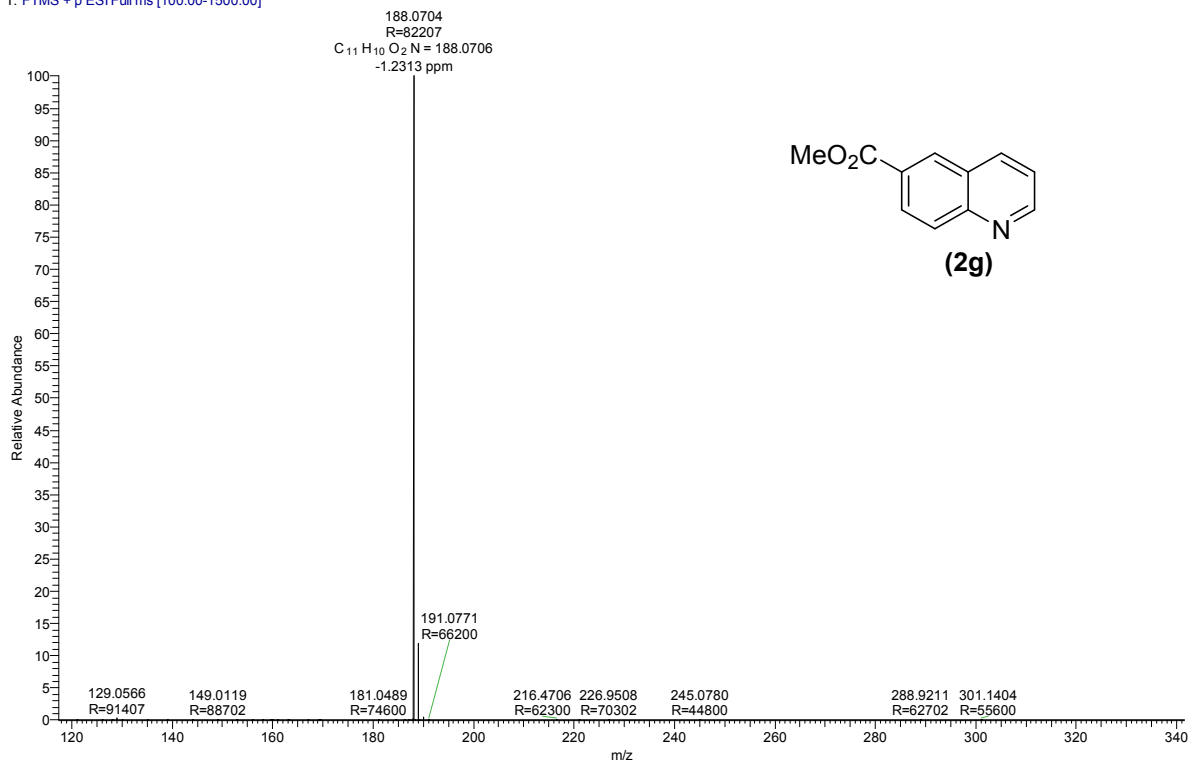

### HRMS of 2g

372-A77 #96 RT: 0.42 AV: 1 NL: 6.08E9  
T: FTMS + p ESI Full ms [100.00-1500.00]

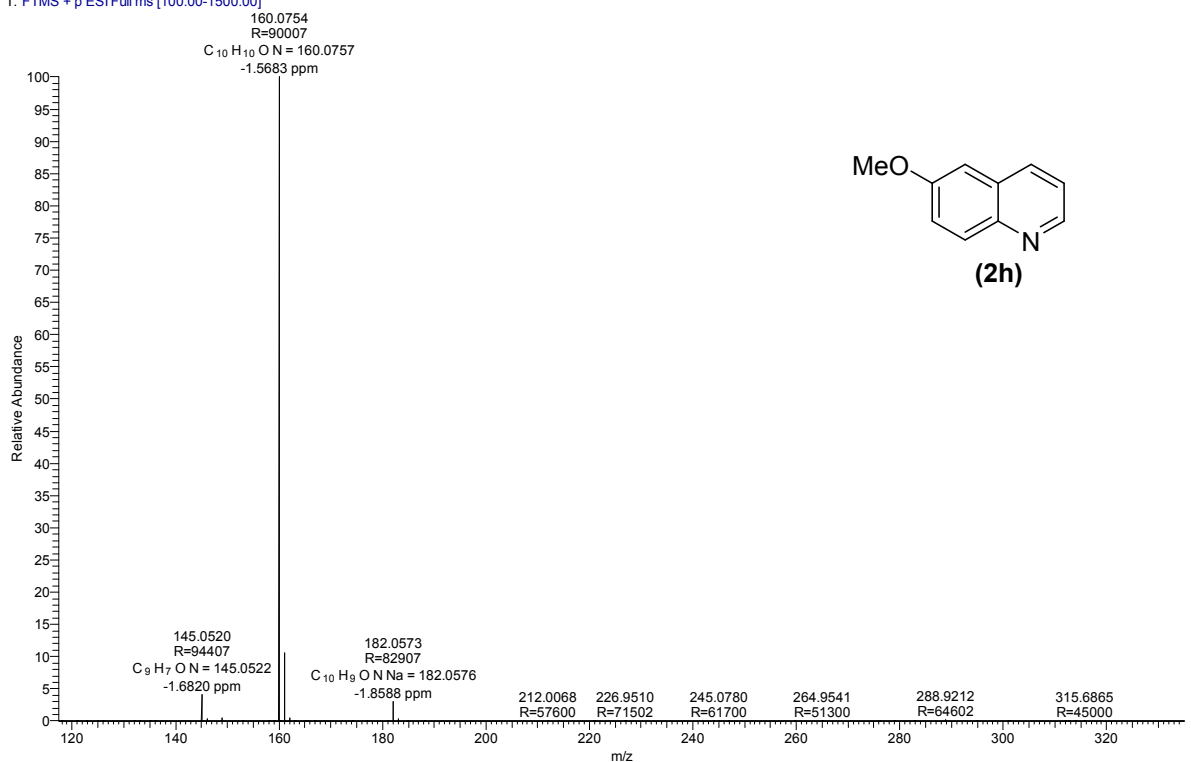

### HRMS of 2h

370-D #102 RT: 0.45 AV: 1 NL: 3.36E9  
T: FTMS + p ESIFull ms [100.00-1500.00]

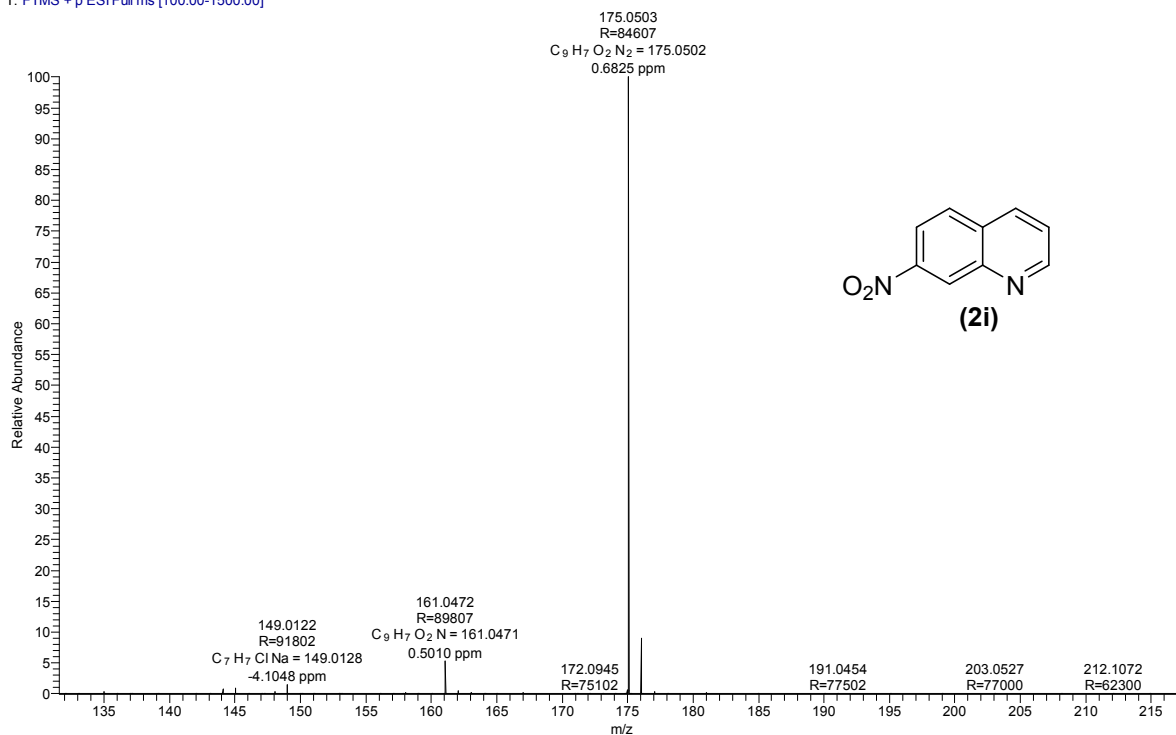

HRMS of **2i**

MKS-2T #113 RT: 0.50 AV: 1 NL: 4.43E9  
T: FTMS + p ESIFull ms [100.00-1500.00]

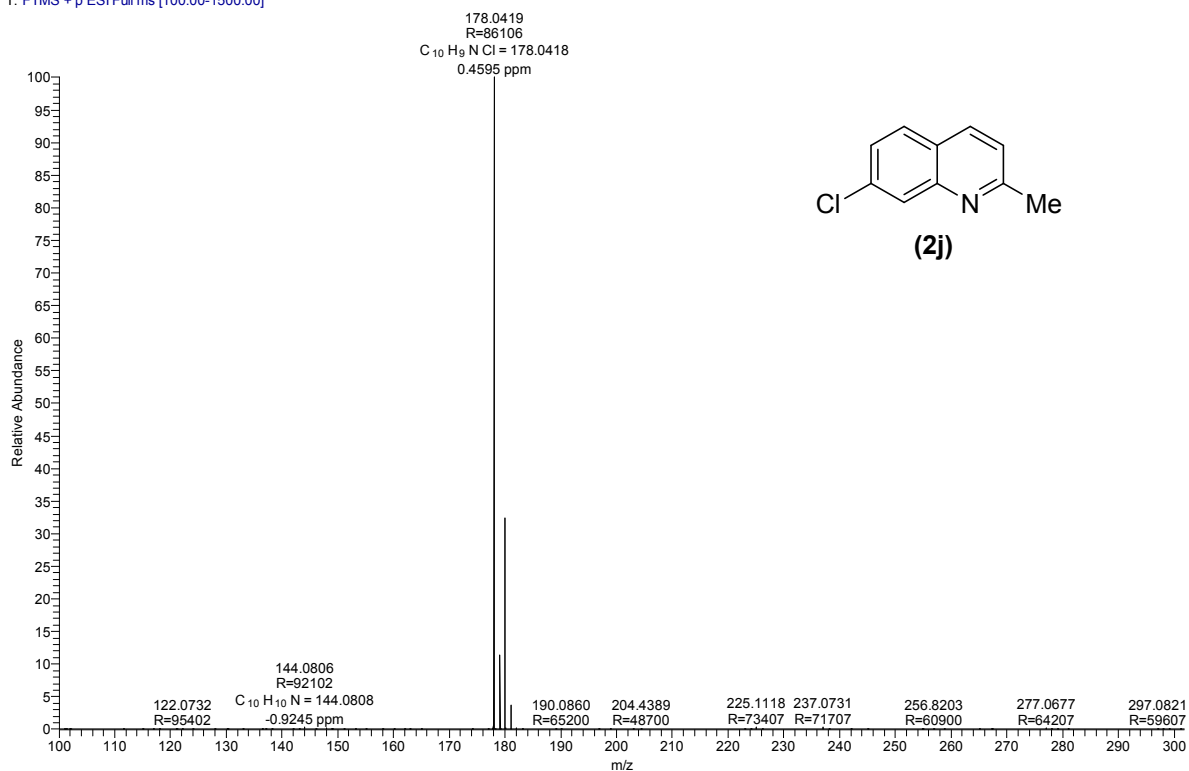

HRMS of **2j**

372-A15 #112 RT: 0.50 AV: 1 NL: 2.76E8  
T: FTMS + p ESI Full ms [100.00-1500.00]

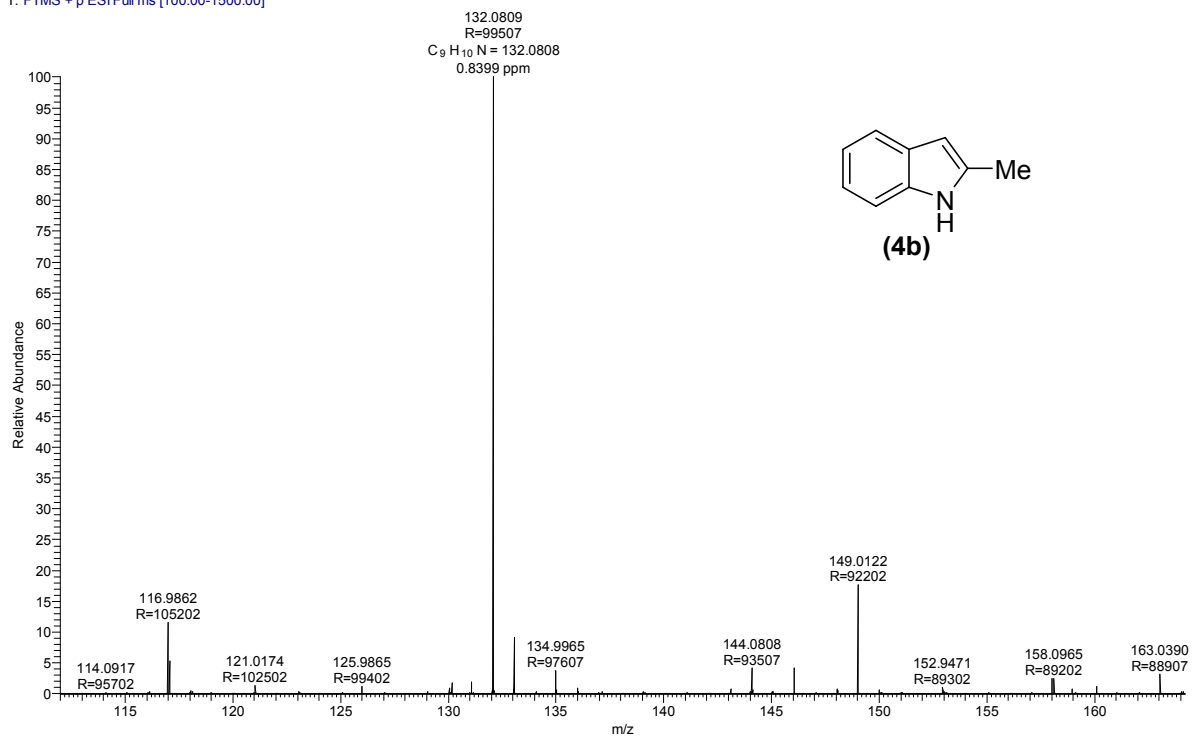

372-A37 #103 RT: 0.46 AV: 1 NL: 2.60E7  
T: FTMS + p ESI Full ms [100.00-1500.00]

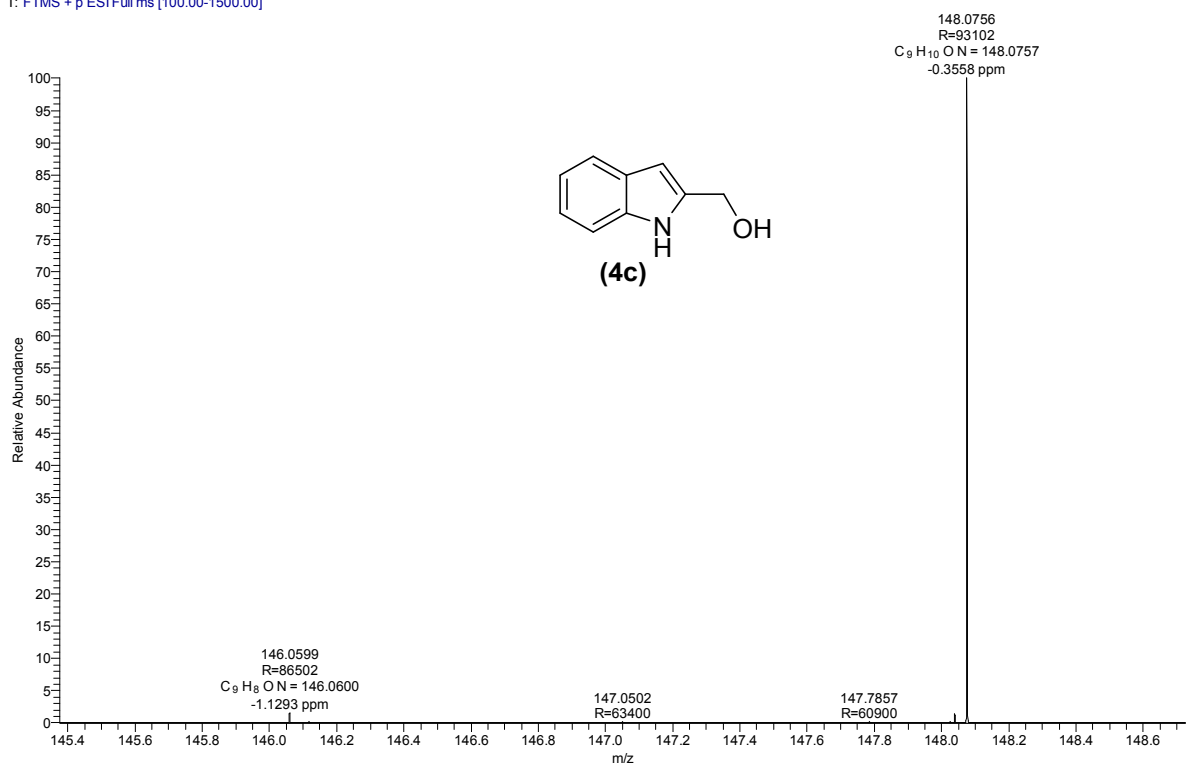



372-A30 #156 RT: 0.69 AV: 1 NL: 8.52E6  
T: FTMS + p ESI Full ms [100.00-1500.00]

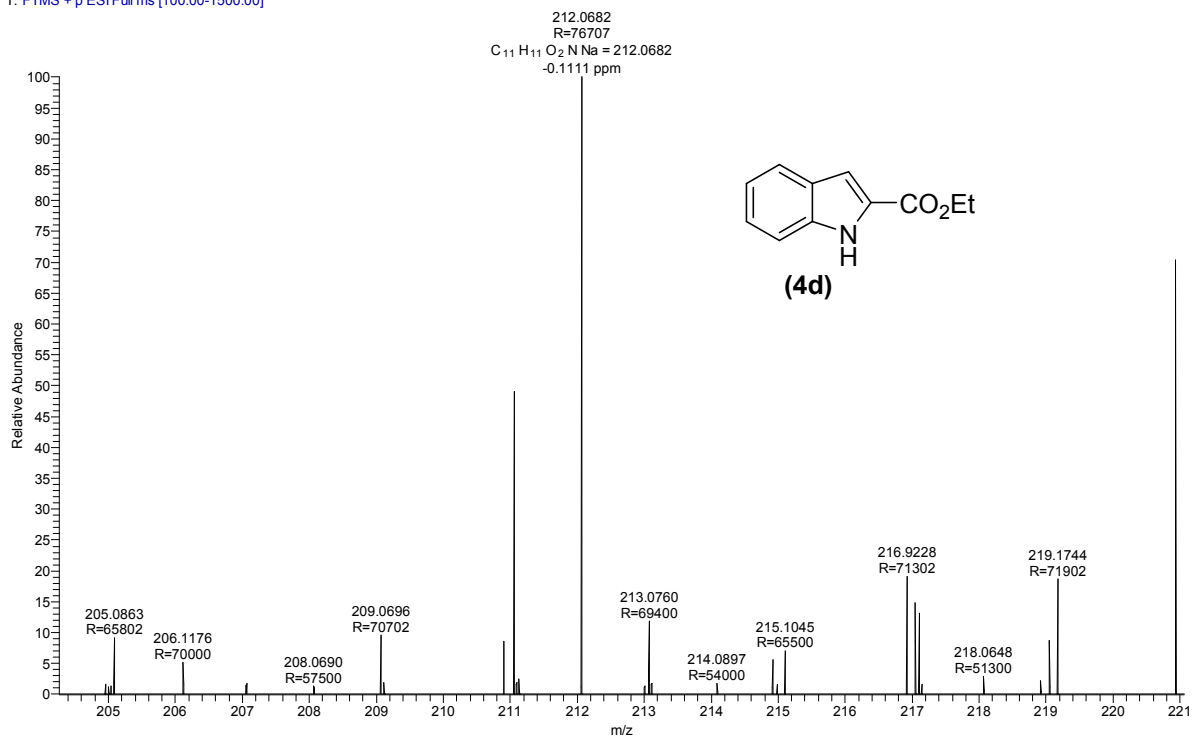

HRMS of 4d

SM-372-A66 #101 RT: 0.45 AV: 1 NL: 8.41E7  
T: FTMS + p ESI Full ms [100.00-1500.00]

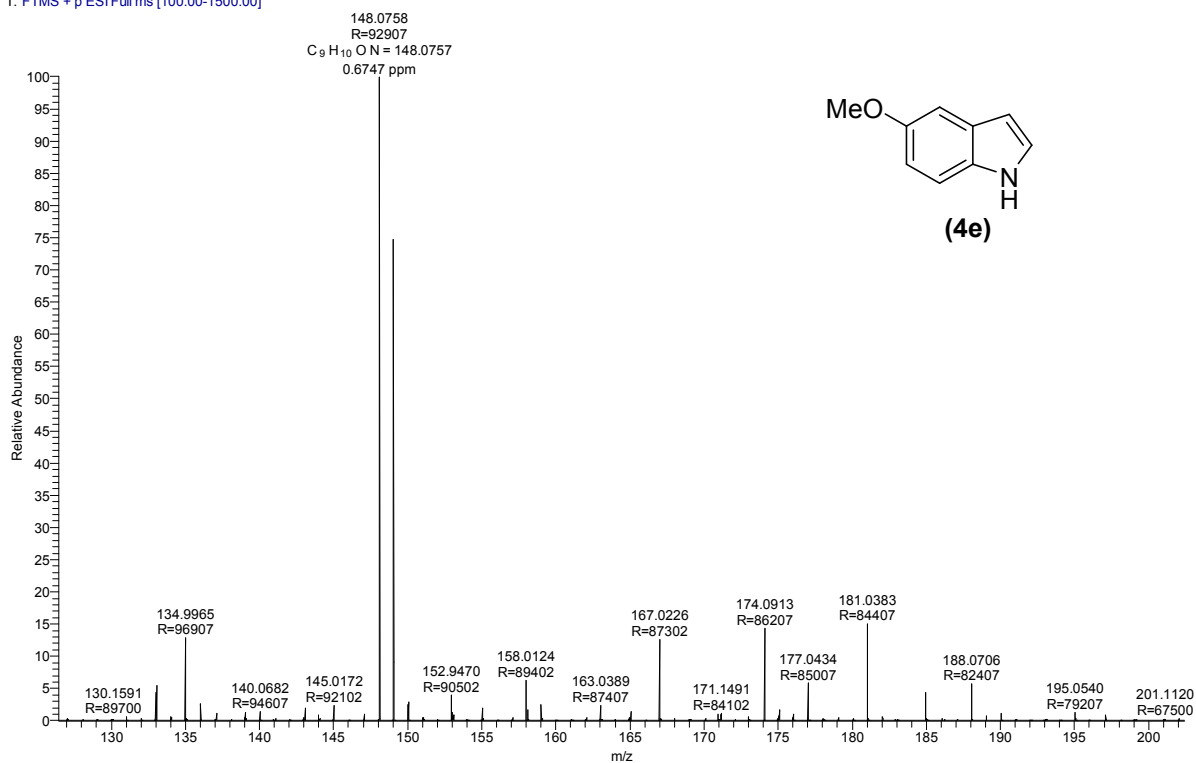

HRMS of 4e

MKS-6B #126 RT: 0.56 AV: 1 NL: 1.14E10  
T: FTMS + p ESI Full ms [100.00-1500.00]

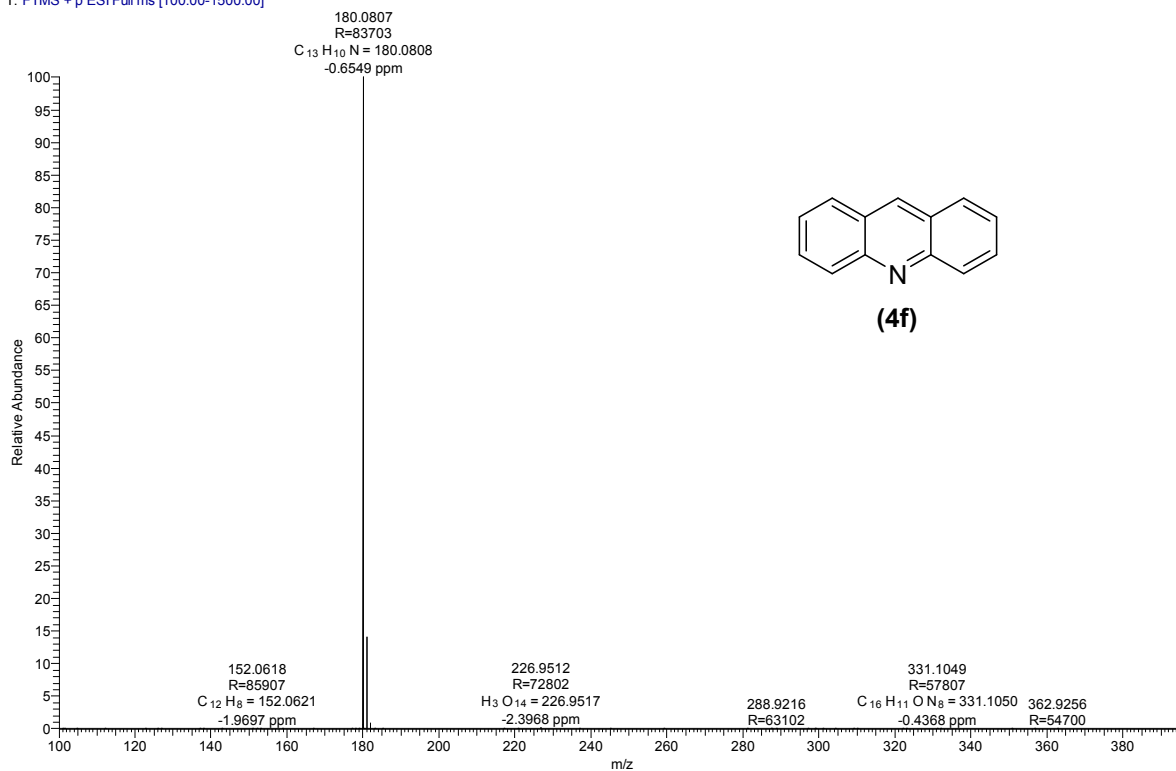

### HRMS of **4f**

MKS-6F #107 RT: 0.47 AV: 1 NL: 2.28E9  
T: FTMS + p ESI Full ms [100.00-1500.00]

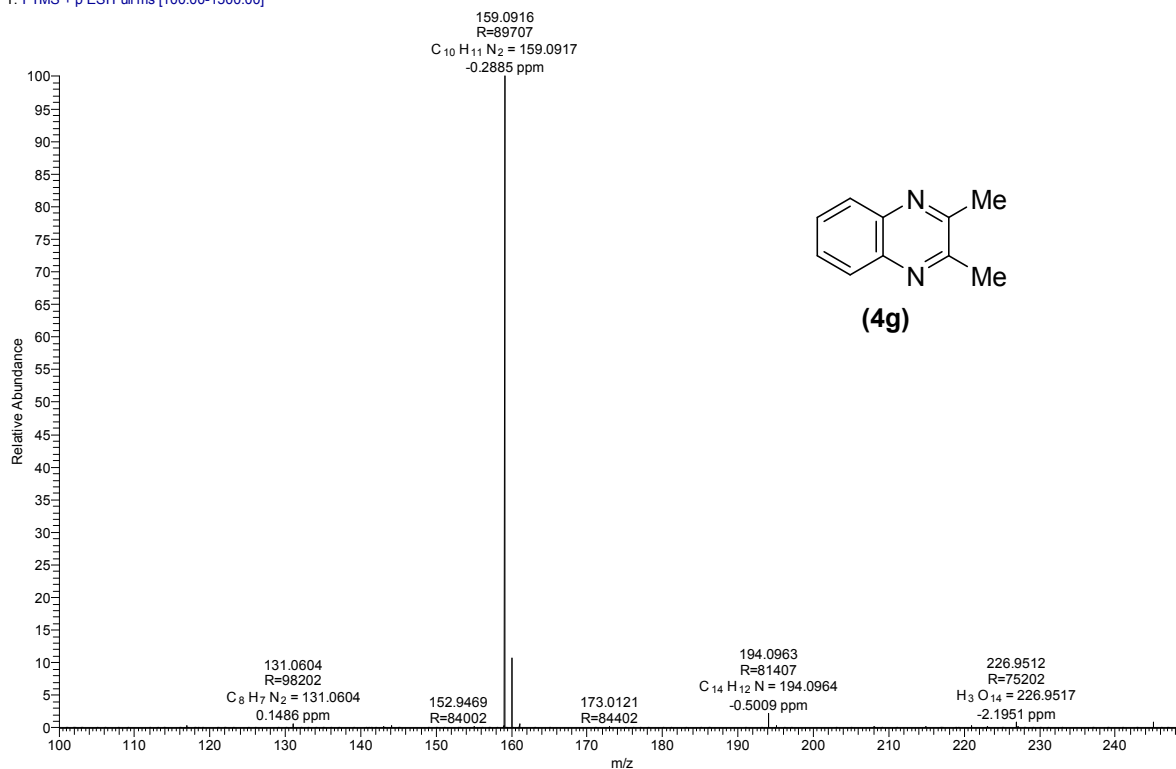

### HRMS of **4g**

MKS-6G #132 RT: 0.59 AV: 1 NL: 3.87E9  
T: FTMS + p ESI Full ms [100.00-1500.00]

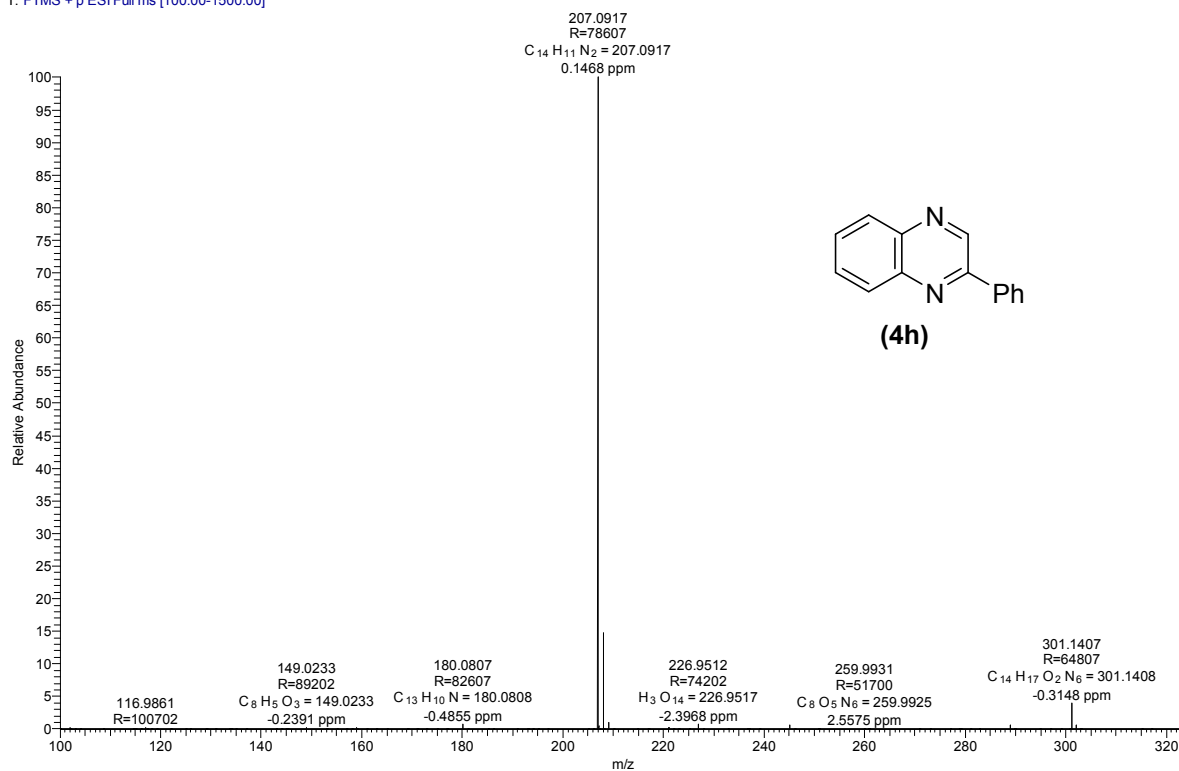

HRMS of **4h**
